# Supplementary material
Source: PubMed Central journal article supplement (PMC3753700)

The following protocol information is provided solely to describe how the authors conducted the research underlying the published report associated with the following article:

**Patterns of recurrence and outcome according to breast cancer subtypes in lymph node-negative disease – Results from International Breast Cancer Study Group Trials VIII and IX**

**Metzger-Filho, et al**

DOI: 10.1200/JCO.2012.46.1574

The information provided may not reflect the complete protocol or any previous amendments or modifications. As described in the Information for Contributors (<http://jco.ascopubs.org/site/ifc/protocol.xhtml>) only specific elements of the most recent version of the protocol are requested by JCO. The protocol information is not intended to replace good clinical judgment in selecting appropriate therapy and in determining drug doses, schedules, and dose modifications. The treating physician or other health care provider is responsible for determining the best treatment for the patient. ASCO and JCO assume no responsibility for any injury or damage to persons or property arising out of the use of these protocol materials or due to any errors or omissions. Individuals seeking additional information about the protocol are encouraged to consult with the corresponding author directly.

# International Breast Cancer Study Group

---

Coordinating Center  
Effingerstrasse 40  
CH-3008 Bern

Tel +41 31 389 91 91  
Fax +41 31 389 92 00  
e-mail siakcc@sakk.ch

- Principal Investigators
- Data Managers / ANZ
- Statistical Center
- Data - Management Center ( USA )
- Scientific Committee
- Foundation Council

July 29, 1999

## **RE: - CLOSURE OF IBCSG TRIALS**

Dear colleagues

Please note that study:

- IX
- 12-93
- 13-93
- 14-93

will be closed per 01. August 1999. Our ongoing projects are:

- trial VIII
- trials 10-93, 15-95, 16-98, 17-98, 18-98 and 20-98

BEST REGARDS

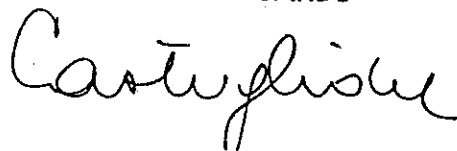

PD DR. MONICA CASTIGLIONE  
STUDY COORDINATOR

# International Breast Cancer Study Group

## Trial IX

### Addendum 12

#### Reasons for Addendum:

- To limit entry to patients with estrogen receptor-positive tumors.

#### Rationale for Change:

Substantial data exist from the most recent Overview that patients with ER-negative tumors obtain little or no benefit from endocrine therapy. Therefore, there is evidence that one of the treatment arms may be inferior for this subgroup.

#### Summary of Changes:

- 1) Patients with tumors ER-negative or ER-unknown are not eligible for Trial IX.
- 2) Patients with tumors ER-positive remain eligible for Trial IX.

#### Specifically:

- Patient Population: Delete "ER- or ER unknown."
- Add Section 3.2.12, under "Criteria for Patient Ineligibility":  
3.2.12 Patients who have estrogen receptor-negative tumors or who are estrogen receptor status unknown.

#### Activation Date:

1 August 1998

# International Breast Cancer Study Group

## Trial IX

### Addendum 11

#### Reasons for Addendum:

- To simplify the logistics of obtaining quality of life assessments following treatment failure.

#### Summary of Changes:

- 1) All patients, REGARDLESS OF DISEASE STATUS are to be assessed on the same schedule. Patients whose tumors have recurred are to be followed on the same schedule as those whose tumors have not recurred. QL assessments are required for all patients for 6 years.
- 2) The requirements for QL assessments within 1 month of and at 6 months after treatment failure have been dropped.

#### Specifically:

- Delete Addendum 4.
- Amend your current version of Table of Study Parameters (Table 7.6, June 1995 revision) by crossing out the footnote on QL assessments:  
[Until treatment failure. Also required within 1 month and at 6 months after treatment failure.]
- Amend Section 10, Form QL by crossing out the second sentence:  
[A QL Form should also be completed one month after relapse 6 months thereafter (+ 1 month).]
- Amend Appendix III (Psychosocial Assessment), Section 3b (Methods: Timing of measurements) by crossing out the second sentence:  
[A QL form should be filled in one month after recurrence of any type and 6 months later.]

#### Activation Date:

1 December 1996

# International Breast Cancer Study Group

## Trial IX

### Addendum 10 Parts A and B

#### A: Reason for Addendum

This addendum simplifies the dose modification schedule and ensures a higher dose will be administered.

#### Summary of Changes:

Section 5.2.1 has been revised extensively. Please cross out section 5.2.1 (page 10 and 11) and insert the attached page into your protocol document.

#### B: Reason for Addendum

The Coordinating Center's address, phone and fax numbers have changed.

#### Summary of Changes:

On September 15, 1996, the Coordinating Center moved to a new location in Bern. Please note the change of address, telephone, and fax numbers. Please update the telephone and fax number on the first page of all protocols and the address in the "Records to be Kept" section 10.1.

IBCSG Coordinating Center  
Effingerstrasse 40  
CH-3008 Bern  
Phone: +41 31 389 91 91  
Fax: +41 31 389 92 00

#### Activation Date:

1 December 1996

5.2 DOSE MODIFICATIONS: (CMF Regimen only)

5.2.1 Hematological toxicity: Standard International Breast Cancer Study Group modifications of CMF will be used. Doses of cyclophosphamide, methotrexate, and 5-fluorouracil will be administered according to the following guidelines, based on blood counts performed on the day of treatment administration:

Percentage of full dosage to be given:

|                  |                            |                                                                                                             |                                                                                                                                         |
|------------------|----------------------------|-------------------------------------------------------------------------------------------------------------|-----------------------------------------------------------------------------------------------------------------------------------------|
| <b>Platelets</b> | <b>WBC</b>                 | <b>WBC</b>                                                                                                  | <b>WBC</b>                                                                                                                              |
| $\geq 75,000$    | $>3 \times 10^9/l$<br>100% | $2.0-3.0 \times 10^9/l$<br>75%                                                                              | $<2.0 \times 10^9/l$<br>Delay one week then<br>treat according to scale.<br>If WBC still below 2.0,<br>omit treatment for that<br>week. |
| $< 75,000$       | 75%                        | Delay one week then treat<br>according to scale. If<br>WBC still below 2.0, omit<br>treatment for that week |                                                                                                                                         |

Do not reduce dose for grade 3 nadir hematologic toxicity not associated with morbidity. For grade 3 toxicity associated with morbidity or grade 4 toxicity, dose may be reduced in the next cycle by 25%.

Patients should be closely monitored while on treatment.

A re-escalation of drug dosage should be performed only in cases where close monitoring of the patient is possible.

Reduce subsequent doses by 25% for lowest WBC  $< 1.0 \times 10^9/l$  without toxicity or WBC  $1.0 \times 10^9/l - 1.5 \times 10^9/l$

# INTERNATIONAL BREAST CANCER STUDY GROUP

## Trial IX

### Addendum 9

This addendum includes two protocol modifications:

1. The target sample size will increase from 1200 to 1600 patients to enable more precise estimation of treatment effect size.
2. Interim analysis monitoring plans will be modified to accommodate the increased target sample size and allow early termination of accrual.

Activation Date:

June 1, 1995

**Addendum 9, June 1, 1995**

**Revised Statistical Considerations for IBCSG Trial IX - Recommended by the Scientific Committee on March 4, 1995**

The following two changes will be made to the statistical considerations:

1. The total sample size will be increased from 1200 to 1600 patients.
2. Formal statistical rules will be applied for potential early stopping.

**Rationale:**

Ten-year follow-up data for the 496 postmenopausal, node-negative patients in Trial V with known estrogen receptor values suggested an interaction between estrogen receptor status of the primary tumor and the effectiveness of a single cycle (days 1 and 8) of i.v. CMF perioperative chemotherapy ( $p=0.004$  for DFS;  $p=0.04$  for OS). Postmenopausal patients with ER-negative tumors benefitted significantly from the single perioperative cycle of adjuvant chemotherapy compared with surgical controls (10-year DFS percents: 71% ( $n=102$ ) versus 48% ( $n=58$ ),  $p=0.0006$ ; 10-year OS percents: 77% versus 62%,  $p=0.01$ ). In contrast, the results for patients with ER-positive tumors were the same regardless of treatment group (10-year DFS percents: 57% ( $n=231$ ) versus 57% ( $n=105$ ),  $p=0.91$ ; 10-year OS percents: 73% versus 75%,  $p=0.84$ ). Therefore, a sufficient number of patients should be enrolled in Trial IX to allow separate analyses to be conducted according to estrogen-receptor status of the primary tumor.

**Revised Sample Size:**

The original sample size for Trial IX was 900 patients, 600 with ER-positive tumors and 300 with ER-negative tumors. This was increased to 1200 patients according to addendum 5 issued in June, 1993, to obtain 300 patients with ER-negative tumors (given that 25% rather than 33% of the entries were ER-negative). As of December 31, 1994, 1026 eligible patients had been enrolled, 688 (67%) ER-positive, 260 (25%) ER-negative, and 78 (8%) ER-unknown. The overall sample size of 1200 provides an 80% power to detect a disease-free survival difference of 7.5% (75% to 82.5% 5-year DFS) corresponding to a 33 percent reduction in the risk of an event. By increasing the sample size to 1600 patients, the trial will have an 80% power to detect a disease-free survival difference of 6.0% (75% to 81%) overall corresponding to a 26.8 percent reduction in the risk of an event. This increase will also enable an analysis for ER-positive tumors to detect a 7.5% difference (33% relative risk reduction) and an analysis for ER-negative tumors to detect an 11.6% difference (50% relative risk reduction). The total sample size should be increased to **1600 patients**. At the current rate of 168 patients enrolled annually, this objective will be achieved in June, 1998.

**Interim Monitoring:**

Interim monitoring will be performed to allow early termination of accrual to the study. Two interim analyses are planned prior to reaching five years of median follow-up. The main analysis will be conducted in coded fashion to determine if sufficient evidence exists to modify the protocol on the basis of observed differences in systemic disease-free survival (SDFS). With the increased total sample size of 1600 patients, the target number of total events for disease-free survival comparisons is 350. As of December 31, 97 patients experienced events and 77 of these were systemic events. Thus, about 80 percent of all events are systemic events and the target number of systemic events for the study is anticipated to be 280. Two interim analyses and one final analysis will be planned after 100, 195 and 280 systemic events, respectively. The sequential boundary used is based on an O'Brien-Fleming type use function, as described by Kim and Tsiatis. The p-values to be used at the 3 analysis times for the two-sided logrank tests are 0.0003, 0.015, and 0.045. We anticipate that 30 more systemic failures will be observed during 1995. Therefore, the first interim analysis of Trial IX will be conducted in early 1996 for review by the Scientific Committee.



# INTERNATIONAL BREAST CANCER STUDY GROUP

## Trial IX

### Addendum 8

June 1, 1995

- The follow-up schedule for this trial has been modified. Please replace Table 7.6 with the attached modified version. Please review the reduced number required tests and frequency of follow-up visits.
- CA 15-3 is optional, but strongly encouraged.
- A Follow-up Form (E) is required yearly starting year 3. (Modification of Section 12 of the protocol.)
- Quality of Life forms are no longer required at months 15 and 21. Quality of Life forms are required at year 3, 4, 5, and 6. (Modification of Section 10 of the protocol and Section 3b of Appendix III.)
- A Follow-up Questionnaire may be used instead of a clinic visit after 10 years of follow-up for patients without overt metastases. Two samples are enclosed. You may adapt one of these to your local language or prepare a more detailed form. If you use the Follow-up Questionnaire you must submit it, along with a Follow-up Form (E), yearly.
- Breast recurrence in the ipsilateral conserved breast is considered a local failure for the purpose of reporting disease-free survival. There are no longer any protocol requirements for treatment following such recurrences.

**7.6 TABLE OF STUDY PARAMETERS (Trial IX)  
REVISED JUNE, 1995**

| REQUIRED                                                                                                                                                                      | Prior to<br>Rand.                                 | During each<br>Day 1 & 8          | CME Cycle<br>Days 9-21 | First Yr.<br>q 3 mos.       | q 6 mos          | Yr. 2<br>q 6 mos. | Yrs 3-10<br>Yearly             | > 10 Years<br>Yearly          |
|-------------------------------------------------------------------------------------------------------------------------------------------------------------------------------|---------------------------------------------------|-----------------------------------|------------------------|-----------------------------|------------------|-------------------|--------------------------------|-------------------------------|
| History &<br>Physical Examination<br>Follow-Up Questionnaire <sup>1</sup>                                                                                                     | X                                                 | X                                 | X                      | X                           | X                | X                 | X                              | X                             |
| Hematology:<br>Hgb or Hct<br>WBC<br>Platelet Count                                                                                                                            | X<br>X<br>X<br>X                                  | X<br>X<br>X<br>X                  | X<br>X<br>X<br>X       |                             |                  |                   |                                |                               |
| Chemistries:<br>Serum Creatinine & BUN<br>Bilirubin<br>Alkaline Phosphatase<br>SGOT or SGPT<br>Gamma-GT<br>Serum Calcium<br>CA 15-3                                           | X<br>X<br>X<br>X<br>X<br>X<br>X<br>X <sup>4</sup> |                                   |                        |                             | X<br>X<br>X<br>X | X<br>X<br>X<br>X  | X<br>X<br>X<br>X               | X<br>X<br>X<br>X <sup>4</sup> |
| X-Rays / Scans:<br>Chest (PA and Lateral)<br>Xeromammogram<br>or Mammogram <sup>3</sup><br>Liver CAT scan or ultrasound <sup>3</sup><br>Bone Scan (Bone X-Ray) <sup>2,3</sup> |                                                   |                                   |                        | X, then yearly <sup>3</sup> |                  |                   |                                |                               |
| Quality of Life Evaluation                                                                                                                                                    |                                                   | X <sup>5</sup> (day 1 of therapy) | X <sup>5</sup>         | X <sup>5</sup>              | X <sup>5</sup>   | X <sup>5</sup>    | X <sup>5</sup> (through 6 yrs) |                               |
| Hormone Receptors: must be determined on primary tumor, if at all possible; at recurrent disease.                                                                             |                                                   |                                   |                        |                             |                  |                   |                                |                               |
| X = For all patients.                                                                                                                                                         |                                                   |                                   |                        |                             |                  |                   |                                |                               |
| 1 = For disease-free patients only.                                                                                                                                           |                                                   |                                   |                        |                             |                  |                   |                                |                               |
| 2 = If hot spots: X-Ray of suspicious areas must be performed. If bone scan without demonstrable disease, repeat scan within 3 months.                                        |                                                   |                                   |                        |                             |                  |                   |                                |                               |
| 3 = Optional, as clinically indicated.                                                                                                                                        |                                                   |                                   |                        |                             |                  |                   |                                |                               |
| 4 = Optional, but strongly encouraged.                                                                                                                                        |                                                   |                                   |                        |                             |                  |                   |                                |                               |
| 5 = Until treatment failure. Also required within 1 month and at 6 months after treatment failure.                                                                            |                                                   |                                   |                        |                             |                  |                   |                                |                               |

# International Breast Cancer Study Group

## Trial IX

### Addendum 7

#### Reason for Addendum:

Information from NSABP protocol B-14 has shown that tamoxifen increases the risk of uterine cancer. After an average of eight years of follow-up, the annual risk observed in this large-scale trial of breast cancer patients taking 20 mg of tamoxifen daily is about two per 1,000 women. This level of risk is approximately three times greater than that of a similar group of women in the general population in the United States. (1)

#### Reference

- (1) Fisher B, Costantino JB, Redmond CK, Fisher ER, Wickerham DL, Cronin WM, Other NSABP Contributors. Endometrial cancer in tamoxifen-treated breast cancer patients: findings from the national surgical adjuvant breast and bowel project (NSABP) B-14. JNCI 7: 527-537, 1994.

#### Summary of Changes:

Section 5.3 has been changed. Please replace section 5.3 with the following:

- 5.3 Side effects of tamoxifen  
Hot flashes, nausea, vaginal discharge or abnormal vaginal bleeding have been reported. Hypercalcemia, bone pain, and retinopathy are rare. Beneficial effects upon lipid and bone metabolism have been reported. Because of the increased risk of uterine cancer, patients receiving tamoxifen should be promptly evaluated in the event of a pelvic complaint. Investigators should remain aware of current recommendations for the gynecological monitoring of asymptomatic women during and after tamoxifen therapy. Any case of endometrial cancer should be promptly reported to the Coordinating Center with extensive clinical therapeutic details. Modification of tamoxifen dosage is rarely indicated. No standard dosage modifications are prescribed.  
Side effects are graded in protocol Appendix II.

#### Activation Date:

1 September 1994

# International Breast Cancer Study Group

## Trial IX

### Addendum 6

#### Reason for Addendum:

A new Quality of Life (QL) assessment form was developed for the new generation of trials. This one-page form no longer has the Bf-S item checklist (page 2 of the old form) and has the previous LASA scales, plus six new scales. In order to simplify data collection, the new form replaces the old form for all trials, including Trials VI through IX.

#### Summary of Changes:

1. The new version of the Quality of Life assessment form should be used. The timing of the QL assessments has not changed. See Appendix V to any one of Protocols 10-93 through 14-93 for a description of the new LASA scales.
2. The noncompliance form has been modified, and only needs to be completed once per patient for those patients who refuse or are unable to continue participation. This simplifies the past requirement that this form be submitted every time a QL form was missed.

#### Activation Date:

1 May 1993

**INTERNATIONAL BREAST CANCER  
STUDY GROUP**

**STUDY IX**

**ADDENDUM 5**

This addendum includes two protocol modifications:

- 1. The target sample size will increase from 900 to 1200 patients to enable more precise estimation of treatment effect size.**
- 2. Interim analysis monitoring plans will be implemented to allow early termination of accrual.**

## **Addendum 5, June 1, 1993**

Revised Statistical Considerations for IBCSG Study IX  
Recommended by the Scientific Committee on May 25, 1993

The following two changes will be made to the statistical considerations:

1. The total sample size will be increased from 900 to 1200 patients.
2. Formal statistical rules will be applied for potential early stopping.

### **Rationale:**

Eight-year follow-up data for the 469 postmenopausal, node-negative patients in Trial V with known estrogen receptor values suggested an interaction between estrogen receptor status of the primary tumor and the effectiveness of a single cycle (days 1 and 8) of i.v. CMF perioperative chemotherapy ( $p=0.002$ ). Postmenopausal patients with ER-negative tumors benefitted significantly from the single perioperative cycle of adjuvant chemotherapy compared with surgical controls (8-year DFS percents: 77% ( $n=102$ ) versus 47% ( $n=58$ ),  $p=0.0001$ ; 8-year OS percents: 82% versus 65%,  $p=0.006$ ). In contrast, the results for patients with ER-positive tumors were the same regardless of treatment group (8-year DFS percents: 61% ( $n=231$ ) versus 58% ( $n=105$ ),  $p=0.93$ ; 8-year OS percents: 82% versus 83%,  $p=0.88$ ). Therefore, a sufficient number of patients should be enrolled in Trial IX to allow separate analyses to be conducted according to estrogen-receptor status of the primary tumor.

### **Revised Sample Size:**

The original sample size for Trial IX was 900 patients, 600 with ER-positive tumors and 300 with ER-negative tumors. As of November 26, 1992, 689 eligible patients had been enrolled, 445 (65%) ER-positive, 168 (24%) ER-negative, and 76 (11%) ER-unknown. To achieve the goal of 300 patients with ER-negative tumors (80% power to detect an improvement in 5-year DFS from 75% to 87.5%), the total sample size should be increased to 1200 patients.

### **Interim Monitoring:**

Interim monitoring will be performed to allow early termination of accrual to the study. Two interim analyses are planned prior to reaching five years of median follow-up. The target number of events for the study is 260, so interim analyses will be planned after 90 events and after 180 events have been observed. The main analysis will be conducted in coded fashion to determine if sufficient evidence exists to modify the protocol on the basis of observed differences in systemic disease-free survival (SDFS). The sequential boundary used is based on an O'Brien-Fleming type use function, as described by Kim and Tsiatis. The  $p$ -values to be used at the 3 analysis times for the two-sided logrank tests are 0.0003, 0.015, and 0.045.

INTERNATIONAL BREAST CANCER  
STUDY GROUP

STUDY IX

ADDENDUM 4

One Quality of Life Form should be completed one month after relapse of any type and 6 months thereafter (± 1 month).

**INTERNATIONAL BREAST CANCER  
STUDY GROUP**

**STUDY IX**

**ADDENDUM 3**

**Tamoxifen treatment has to be  
administered  
for the duration of  
5 years**



**INTERNATIONAL BREAST CANCER  
STUDY IX**

**ADDENDUM II**

**TAMOXIFEN** has to be given for the duration  
of **4 years** (instead of 3 years).

Bern, May 1, 1989

# INTERNATIONAL BREAST CANCER STUDY IX

## ADDENDUM I

Chest X-ray during follow-up for N- patients  
is required only once a year.

Bern, May 1, 1989

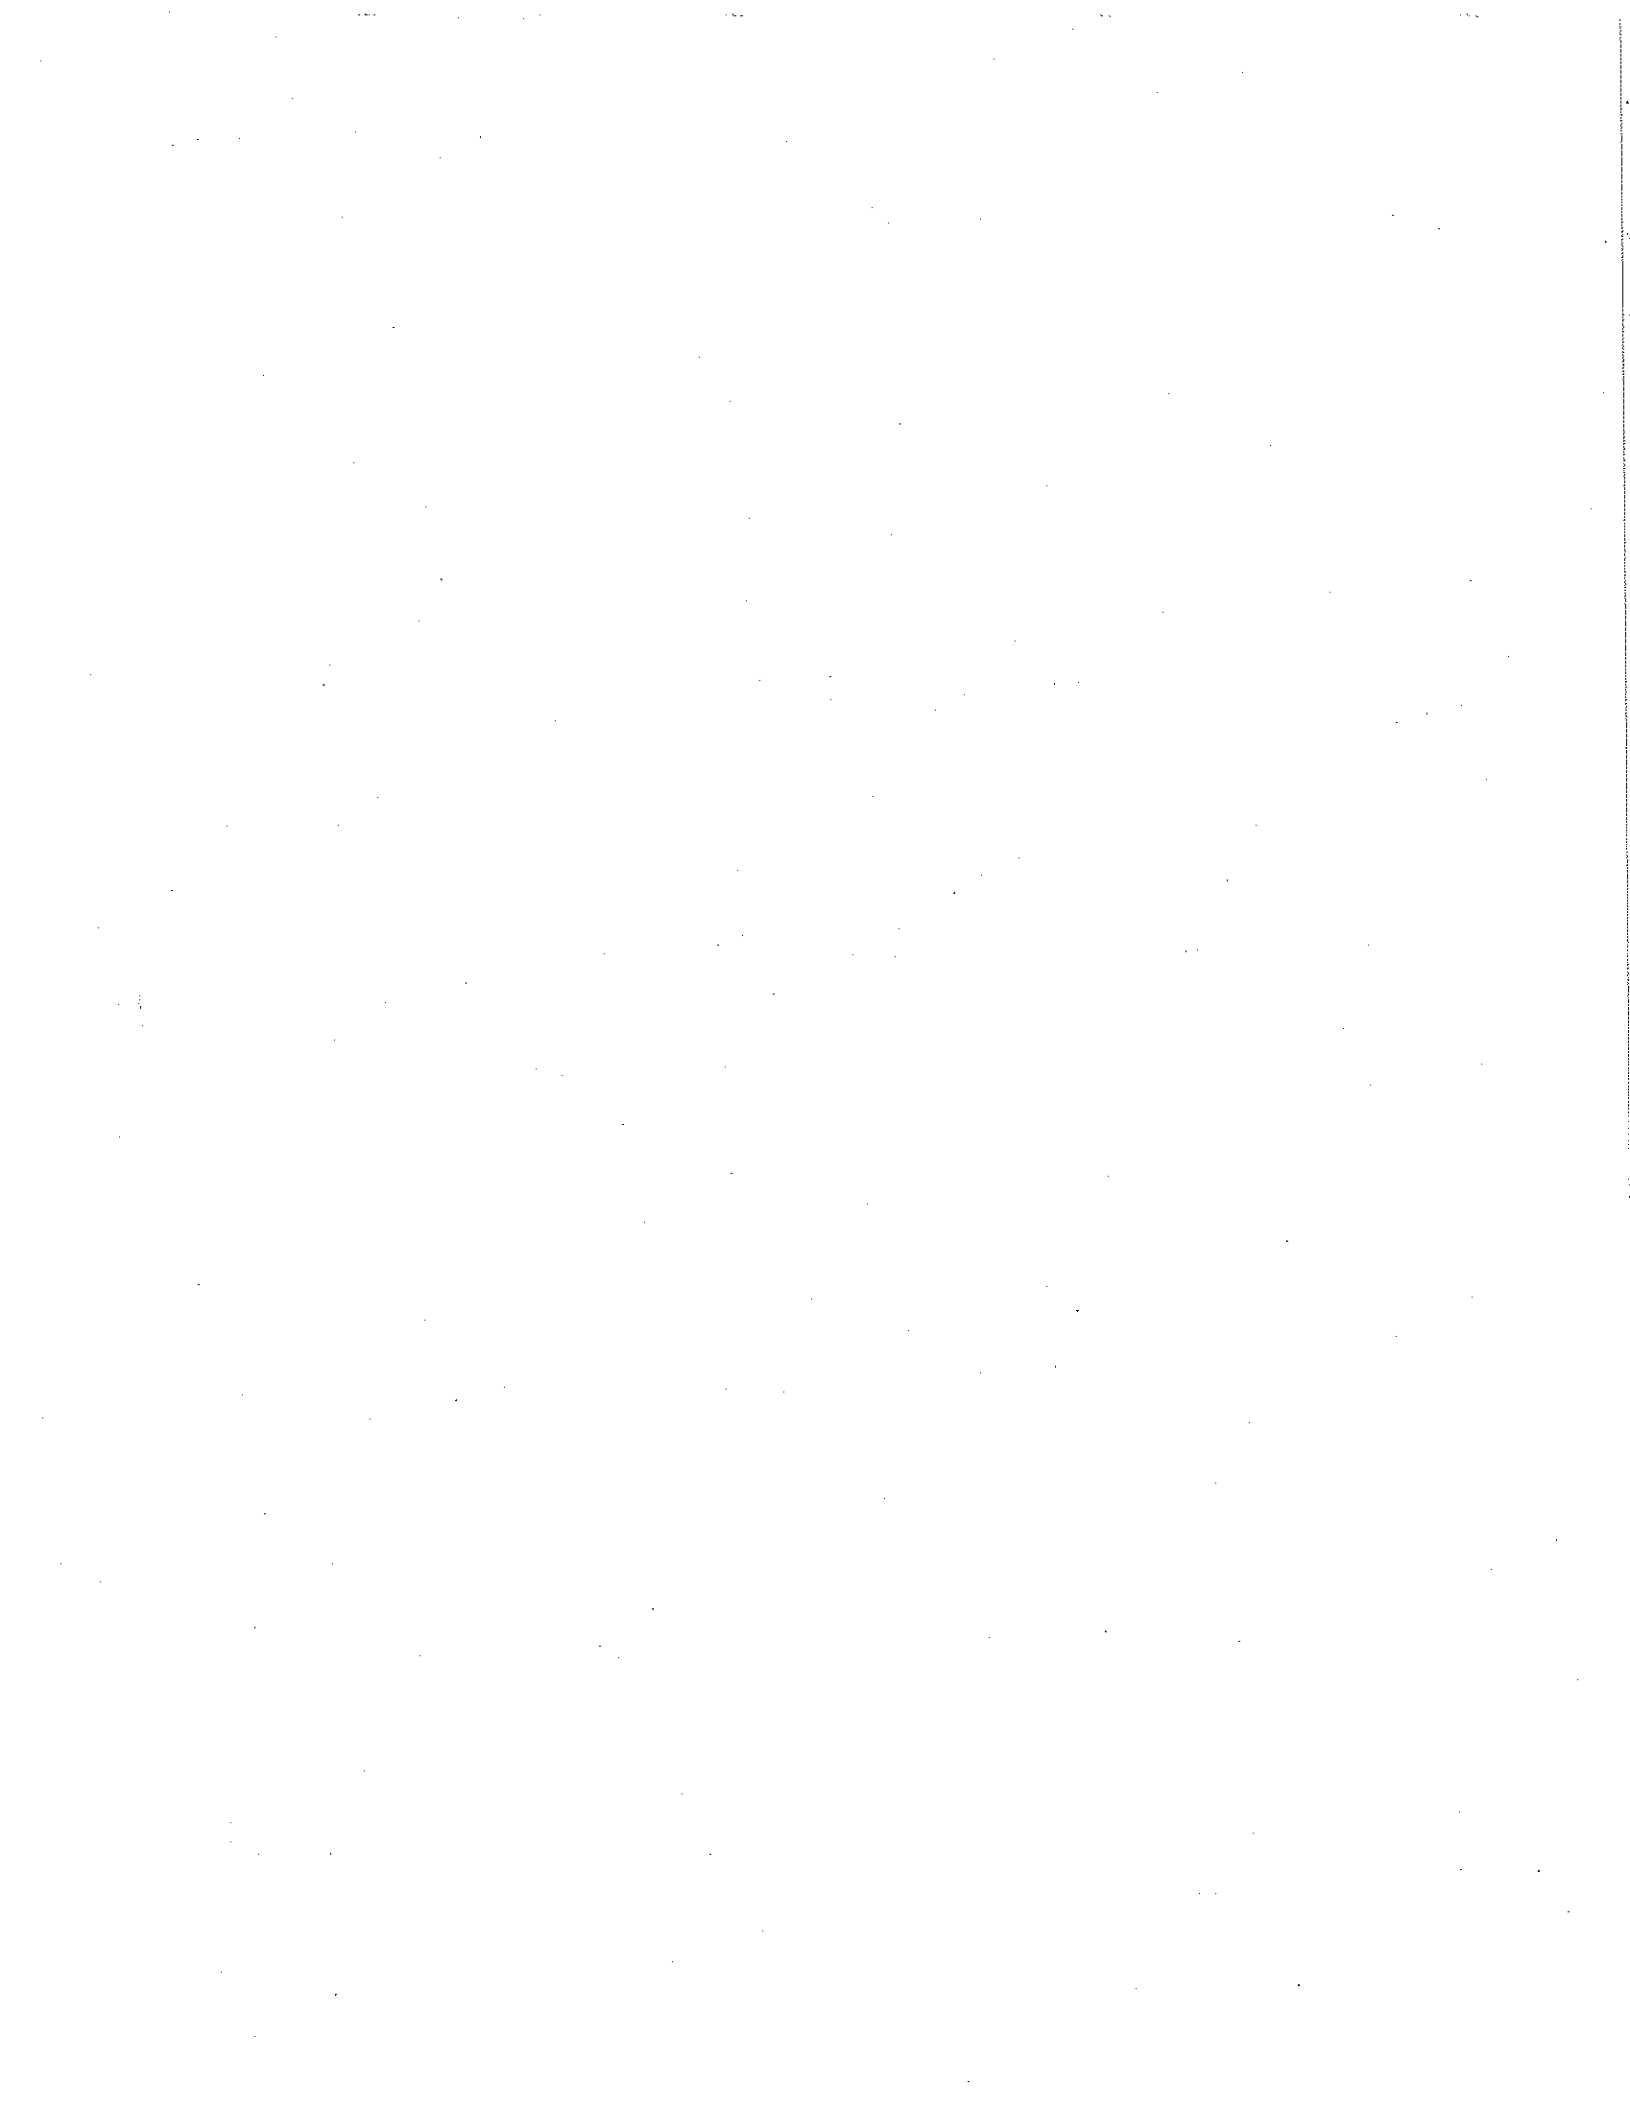

INTERNATIONAL BREAST CANCER STUDY IX  
ADJUVANT THERAPY IN N- POSTMENOPAUSAL PATIENTS WITH  
OPERABLE BREAST CANCER

Patient population Postmenopausal patients with histologically proven breast cancer, who have had either a total mastectomy with axillary clearance, or a lesser procedure (quadrantectomy or lumpectomy) with axillary lymph node dissection (+/- radiotherapy), and who are classified as T1a,b,c, T2, T3, N0 (pathologically negative), M0 (UICC 1987), ER+, ER- or ER unknown.

Patient entry Patients will be randomized after surgery but before the end of the 6th week post-operatively.

|                                                                                                                                                                                                                                                                              |                                                                                                                                                                                                                                                                                                       |   |   |    |                                                                                                                                |
|------------------------------------------------------------------------------------------------------------------------------------------------------------------------------------------------------------------------------------------------------------------------------|-------------------------------------------------------------------------------------------------------------------------------------------------------------------------------------------------------------------------------------------------------------------------------------------------------|---|---|----|--------------------------------------------------------------------------------------------------------------------------------|
| <u>Study design: IBCS IX</u>                                                                                                                                                                                                                                                 |                                                                                                                                                                                                                                                                                                       |   |   |    |                                                                                                                                |
| <u>POSTMENOPAUSAL N- Stratification</u>                                                                                                                                                                                                                                      |                                                                                                                                                                                                                                                                                                       |   |   |    |                                                                                                                                |
| <table border="1" style="width: 100%; border-collapse: collapse;"> <tr><td style="text-align: center;">S</td></tr> <tr><td style="text-align: center;">U</td></tr> <tr><td style="text-align: center;">R</td></tr> <tr><td style="text-align: center;">G.</td></tr> </table> | S                                                                                                                                                                                                                                                                                                     | U | R | G. | <ul style="list-style-type: none"> <li>- Institution</li> <li>- ER Status</li> <li>- Radiother. y/n</li> </ul>                 |
| S                                                                                                                                                                                                                                                                            |                                                                                                                                                                                                                                                                                                       |   |   |    |                                                                                                                                |
| U                                                                                                                                                                                                                                                                            |                                                                                                                                                                                                                                                                                                       |   |   |    |                                                                                                                                |
| R                                                                                                                                                                                                                                                                            |                                                                                                                                                                                                                                                                                                       |   |   |    |                                                                                                                                |
| G.                                                                                                                                                                                                                                                                           |                                                                                                                                                                                                                                                                                                       |   |   |    |                                                                                                                                |
| <table border="1" style="width: 100%; border-collapse: collapse;"> <tr><td style="text-align: center;">R</td></tr> <tr><td style="text-align: center;">A</td></tr> <tr><td style="text-align: center;">N</td></tr> <tr><td style="text-align: center;">D.</td></tr> </table> | R                                                                                                                                                                                                                                                                                                     | A | N | D. | <ul style="list-style-type: none"> <li>E TAM <sup>Ⓢ</sup> (3 years)</li> <li>F CMFx3 + <sup>Ⓢ</sup> TAM (33 months)</li> </ul> |
| R                                                                                                                                                                                                                                                                            |                                                                                                                                                                                                                                                                                                       |   |   |    |                                                                                                                                |
| A                                                                                                                                                                                                                                                                            |                                                                                                                                                                                                                                                                                                       |   |   |    |                                                                                                                                |
| N                                                                                                                                                                                                                                                                            |                                                                                                                                                                                                                                                                                                       |   |   |    |                                                                                                                                |
| D.                                                                                                                                                                                                                                                                           |                                                                                                                                                                                                                                                                                                       |   |   |    |                                                                                                                                |
| <u>TREATMENT SCHEDULES</u>                                                                                                                                                                                                                                                   |                                                                                                                                                                                                                                                                                                       |   |   |    |                                                                                                                                |
| <u>oral CMF</u>                                                                                                                                                                                                                                                              | <p>C: 100 mg/m<sup>2</sup> orally days 1-14</p> <p>M: 40 mg/m<sup>2</sup> i.v. days 1 and 8 q 28 days</p> <p>F: 600 mg/m<sup>2</sup> i.v. days 1 and 8</p> <p>TAM: Tamoxifen 20 mg daily for 3 years (Arm E) and 33 ms. (Arm F)</p> <p>Ⓢ radiotherapy (if planned), if less than total mastectomy</p> |   |   |    |                                                                                                                                |
| <u>RANDOMIZATION</u>                                                                                                                                                                                                                                                         |                                                                                                                                                                                                                                                                                                       |   |   |    |                                                                                                                                |
| IBCSG-Operations Office, Seidenweg 63, CH-3012 Bern (Switzerland)<br>Telephone: (0041) 31 24 41 01<br>Telefax: (0041) 31 24 41 03<br>Telex: SAKK CH 912 539                                                                                                                  |                                                                                                                                                                                                                                                                                                       |   |   |    |                                                                                                                                |

INDEX

| <u>Section</u>                                       | <u>Page</u> |
|------------------------------------------------------|-------------|
| 1. Introduction.....                                 | 3           |
| 2. Objectives.....                                   | 4           |
| 3. Patient Selection.....                            | 5           |
| 4. Stratification and Randomization.....             | 8           |
| 5. Treatment Regimens.....                           | 9           |
| 6. End Points and Definitions of Treatment Failure.. | 13          |
| 7. Study Parameters.....                             | 17          |
| 8. Pathology.....                                    | 18          |
| 9. Statistical Considerations.....                   | 23          |
| 10. Records to Be Kept.....                          | 25          |
| 11. References.....                                  | 28          |

Appendices

- I. Radiation Therapy Following Segmental Mastectomy
- II. Toxicity Grading.....
- III. Psychosocial Assessment (Quality of Life).....
- IV. Study Participants.....
- V. Surface Area Tables.....

1. INTRODUCTION

The use of tamoxifen has provided a reduction in deaths due to breast cancer in postmenopausal node-positive and node-negative (N+ and N-) patients (1), but the benefit of tamoxifen treatment may be restricted to patients with ER+ tumors (2,3,4,5).

1.1 A "standard" adjuvant treatment for all postmenopausal patients classified as N+ and ER- has not yet been defined. For the entire postmenopausal patient population, however, the combination of CMFp + TAM (chemo-endocrine therapy) improved disease-free survival as compared with CMFp or surgery alone (6), or with p + TAM or surgery alone (2). In a retrospective analysis of the data from these two trials, patients with ER- tumors were also found to have benefited significantly (7) from the combined regimen. Thus, a prospective evaluation of alternative chemo-endocrine vs. endocrine treatments in this sub-population should be given high priority. In IBCSG Study VII the schedule of concurrent CMF (3 cycles) and continuous tamoxifen for three years is being evaluated in node-positive patients. In Study IX, a sequential combined modality schedule (i.e., 3 cycles of CMF followed by continuous tamoxifen for three years after completion of the cytotoxic treatment) will be compared to tamoxifen alone.

1.2 The optimal duration of treatment with tamoxifen in postmenopausal patients has not yet been established, but an ongoing ECOG randomized trial comparing two vs. five years' treatment with tamoxifen may ultimately provide an answer to this question. A minimum of three years of tamoxifen will be considered standard until additional evidence favoring a longer duration becomes available.

1.3 Results from the NSABP trial B-06 indicate that lumpectomy and local radiotherapy provided equivalent control of disease as compared with total mastectomy (8,9). The Milan National Cancer Institute Trial, which compared quadrantectomy with axillary clearance and radiotherapy to radical mastectomy, resulted in equivalent outcomes for the two treatments in patients with T1 tumors (10,11). Furthermore, similar results have emerged recently from an EORTC study (12). Thus, the combination of segmental mastectomy, axillary clearance and radiotherapy is considered to be acceptable local management. Some ongoing trials evaluate the relevance of local management without radiation therapy because of the question of possible overtreatment for patients with very small tumors.

2. OBJECTIVES

2.1 Trial IX (postmenopausal N- patients)

- a. To compare the combination of three cycles of chemotherapy (CMF) followed by tamoxifen versus tamoxifen alone in terms of disease-free survival, patterns of relapse and overall survival.
- b. Quality of life Study: see Appendix III

3. PATIENT SELECTION

3.1 Criteria for Patient Eligibility

3.1.1 Postmenopausal patients

This group will include patients who are:

- a. > 52 years, with at least 1 year of amenorrhea; or
- b. ≤ 52 years, with 3 or more years of amenorrhea; or
- c. > 55 years, and who have had a hysterectomy, without bilateral oophorectomy or
- d. have biochemical evidence of cessation of ovarian function (in questionable cases).

3.1.2 Node negative disease (without metastases detected at pathologic examination in at least 8 ipsilateral axillary nodes).

3.1.3 Patients must have had

- a. either total mastectomy or, optionally if the tumor was <5 cm, a breast-conserving procedure (lumpectomy or quadrantectomy). In the latter case there should be pathological verification of clear margins. Radiation therapy to the breast is optional for patients with breast-conserving surgery.
- b. Axillary clearance (not sampling) with at least eight lymph nodes for pathological examination.
- c. The surgical procedure within 6 weeks prior to randomization.

3.1.4 Eight lymph nodes histo-pathologically examined.

3.1.5 Tumor confined to the breast with no detected metastases.



- 3.1.6 Adequate marrow function ( WBC > 4000/mm<sup>3</sup> and platelets > 100,000/mm<sup>3</sup>).
- 3.1.7 Documented evidence of adequate renal (creatinine < 120 umol/l) and hepatic (bilirubin < 20 umol/l, SGOT < 60 IU/l) function.
- 3.1.8 Informed consent according to the criteria established within the individual countries.
- 3.2 Criteria for Patient Ineligibility
  - Not eligible are:
    - 3.2.1 Patients with any axillary node involvement;
    - 3.2.2 Patients who have malignant breast tumors other than carcinoma;
    - 3.2.3 Patients who have T4 tumors with ulceration or infiltration (complete fixation) of the skin, with peau d' orange, or who have metastatic disease. Any suspicious manifestation requires additional investigation to rule out metastases.
    - 3.2.4 Patients who have bilateral malignancies, or a mass in the opposite breast, unless the mass is proven by biopsy to be non-malignant.
    - 3.2.5 Patients who have had less than total mastectomy procedure in which the margins of resection contained tumor cells, after which they did not subsequently undergo a total mastectomy (within 4 weeks of the first surgery).
    - 3.2.6 Premenopausal patients (see 3.1.1)

- 3.2.7 Patients with a previous or concurrent malignancy, EXCEPT patients with squamous or basal cell carcinoma of the skin, or adequately treated in-situ carcinoma of the cervix.
- 3.2.8 Patients who have received prior therapy for breast cancer, including prior irradiation, surgery, or chemo- and/or hormonal therapy.
- 3.2.9 Patients with other non-malignant systemic diseases (cardiovascular, renal, hepatic, etc.) which prevent them from being subject to any of the treatment options or to prolonged follow-up.
- 3.2.10 Patients with psychiatric or addictive disorders which prevent them from giving informed consent or being subject to any of the treatment options.
- 3.2.11 Patients who, prior to randomization, have had bone scan showing hot spots which cannot be confirmed as benign disease upon subsequent X-ray examination, or patients with skeletal pain of unknown cause.

4. STRATIFICATION AND RANDOMIZATION

Patients must be randomized within 6 weeks after surgery, so that the adjuvant treatment can be started within the same period of time.

4.1 The following information is required at time of randomization:

4.1.1 MENOPAUSAL STATUS (see Section 3.1.1 for definition)

4.1.2 ESTROGEN RECEPTOR STATUS

ER+ =  $\geq$  10 fmol/mg cytosol protein\*

ER- = < 10 fmol/mg cytosol protein\*

ER unknown: no determination possible

---

\* If only immunochemistry is available then  
ER+ = >+ and ER- = <+

---

4.1.3 For patients with breast-conserving surgery:  
RADIATION THERAPY TO THE BREAST: PLANNED OR NOT

4.1.4 INSTITUTION

4.1.5 METHOD OF INITIAL DIAGNOSIS

- mammography alone as only evidence

- other

4.2 Stratification

The randomization will be stratified by INSTITUTION, ESTROGEN RECEPTOR STATUS, AND RADIATION THERAPY TO THE BREAST PLANNED OR NOT.

4.3 Randomization

4.3.1 patients will be randomized to receive one of the following two treatment options:

- E : TAMOXIFEN 20 MG DAILY FOR 36 MONTHS
- F : CMF X three 28-DAY CYCLES FOLLOWED BY TAMOXIFEN 20 MG DAILY FOR 33 MONTHS.

5. TREATMENT REGIMENS

5.1 Doses and schedules

5.1.1 CMF treatment, with dosages administered as follows:

|                  |                       |        |              |
|------------------|-----------------------|--------|--------------|
| Cyclophosphamide | 100 mg/m <sup>2</sup> | orally | days 1-14    |
| Methotrexate     | 40 mg/m <sup>2</sup>  | i.v.   | days 1 and 8 |
| 5-Fluorouracil   | 600 mg/m <sup>2</sup> | i.v.   | days 1 and 8 |

Repeat every 28 days for 3 cycles.

5.1.2 Tamoxifen 20 mg orally daily continuously for patients receiving either tamoxifen alone or tamoxifen after 3 cycles of CMF. Patients who received three cycles of CMF should start Tamoxifen treatment on Day 15 of Cycle 3.

5.1.3 Radiation therapy will be planned and performed as described in Appendix I.

Radiation therapy is optional for patients who have undergone less than total mastectomy procedures with axillary clearance, where the margins of resection of the primary tumor were found to be pathologically free of malignant tissue.

Radiation therapy should be started within 3 months after randomization for patients who do not receive CMF treatment, and within 2 weeks after the end of the last cycle of adjuvant CMF for all other patients.

5.2 Dose Modifications (CMF regimen only)

5.2.1 Hematologic Toxicity

Dosages of cyclophosphamide, methotrexate and 5-fluorouracil will be administered according to the following guideline, based on blood counts performed on the day of treatment administration:

| <u>Percentage of Full Dosage to be Given</u> |                    |                        |                       |
|----------------------------------------------|--------------------|------------------------|-----------------------|
| <u>Platelets</u>                             | <u>WBC ≥ 4,000</u> | <u>WBC 3,999-2,500</u> | <u>WBC &lt; 2,500</u> |
| ≥100,000                                     | 100%               | 50%                    | 0%                    |
| 99,999-50,000                                | 50%                | 50%                    | 0%                    |
| <50,000                                      | 0%                 | 0%                     | 0%                    |

---

WBC = Total white blood cell count

Dosage of the three drugs can be modified according to neutrophil count on the day of treatment administration according to the following guideline:

| <u>Percentage of Full Dosage to be Given</u> |                       |                           |                          |
|----------------------------------------------|-----------------------|---------------------------|--------------------------|
| <u>Platelets</u>                             | <u>Neutro ≥ 1,900</u> | <u>Neutro 1,500-1,900</u> | <u>Neutro &lt; 1,500</u> |
| ≥100,000                                     | 100%                  | 50%                       | 0%                       |
| 99,999-50,000                                | 50%                   | 50%                       | 0%                       |
| <50,000                                      | 0%                    | 0%                        | 0%                       |

---

Any grade 3 hematologic toxicity noted during the course of treatment should be managed by a 25% dose reduction in the total amount of drug administered in each cycle after hematological recovery.

A re-escalation of drug dosage should be performed only in cases where close monitoring of the patient is possible.

5.2.2 Renal dysfunction at the time of drug administration:

Methotrexate should be administered only in the presence of normal renal function. The monitoring of creatinine should be carried out routinely every two months, and also in cases where impairment of renal function is suspected. SPECIAL CAUTION should be used in order to ensure that patients who receive methotrexate are not concomitantly receiving drugs such as salicylates, sulphonamides, etc., which might increase the toxic effect of methotrexate.

Early onset of toxicities (within 2-3 days of drug administration), such as stomatitis, diarrhea and/or blood count fall, must be considered as premonitory signs for severe Methotrexate toxicity. These should be treated as emergencies, for example through correction of renal function or administration of leucovorin rescue factor.

5.2.3 Hemorrhagic Cystitis: All patients should be instructed on the importance of high fluid intake during cyclophosphamide therapy. If hemorrhagic cystitis occurs in spite of vigorous hydration, cyclophosphamide treatment should be stopped.

5.2.4 Gastrointestinal Toxicity: In the event of severe anorexia, nausea, vomiting, diarrhea, stomatitis, dryness of the mouth or epigastric pain, all therapy should be postponed until the symptoms subside. In the event of debilitating vomiting or diarrhea, a 25% dosage reduction

of CMF is recommended for the next cycle, with subsequent escalation to tolerance. If mucosal ulceration occurs, no 5-FU or methotrexate should be given for the remainder of the cycle. If mucosal ulceration has occurred with a prior treatment, a 50% reduction in 5-FU and methotrexate with subsequent escalation in each cycle by 25% of the original dosage of each drug to tolerance is required.

5.2.5 Neurotoxicity: If ataxia develops, omit 5-FU until resolution. After that, 5-FU may be re-introduced at 50% of full calculated dose with a 25% escalation in each subsequent cycle to tolerance to full dosage.

5.2.6 Other toxicities: If any other toxicities indicate the need to decrease drug dosages, this is allowed; however, the toxicities as well as the changes in dosages must be recorded. Patients will not be excluded from evaluation because of either partial or total drug intolerance.

5.2.7 Any grade 4 toxicity, other than hematologic, noted during the course of treatment should be handled through a 50% reduction in the total dosage administered in the next cycle after full recovery.

5.3 Side effects of tamoxifen

Hot flashes, nausea, occasional vomiting and other rare side effects such as hypercalcemia, have been reported in patients treated with tamoxifen.

6. END POINTS AND DEFINITIONS OF TREATMENT FAILURE

The end points of this trial are:

- a. first confirmation of recurrence or metastatic disease, and/or
- b. death. Autopsy must be performed on all patients entered in the study if at all possible.

Disease-free survival is defined as the time from randomization to relapse (excluding isolated breast recurrence after breast conservation treated with a simple mastectomy), appearance of a second primary tumor, or death from any cause, whichever occurs first.

Overall survival is defined as the time from randomization to death from any cause.

- c. Systemic relapse is defined as any recurrent disease in sites other than local (mastectomy scar or homolateral breast in case of less than mastectomy) or contralateral breast only.

Systemic disease-free survival will be used as surrogate for overall survival for the purpose of possible early stopping of some or all treatment options.

In addition to these end points, other information recorded on the various forms will be collected regularly and analyzed by appropriate statistical procedures. It is important that all failures, local or distant, continue to be registered after first relapse.

6.1 Diagnosis of treatment failure

The diagnosis of first treatment failure depends on the presence of recurrent disease which can be classified as either suspicious or acceptable. In each case, this should be specified and reported. Any events which are not



included in the following guideline as acceptable or suspicious would be considered as unacceptable for positive evidence of disease. The time of recurrence will be designated as when a suspicious lesion, subsequently proven to be a definitive recurrence/metastasis, is first seen. Hormone receptor assays must be performed on re-current disease whenever possible.

6.1.1 Local and regional failure

Loco-regional failure is defined as a tumor recurrence in any soft tissues of the ipsilateral sites, such as the chest wall (local), ipsilateral breast after less than mastectomy (ipsilateral breast), internal mammary, supra-clavicular and/or ipsilateral axillary nodes and/or soft tissue of the axilla (regional).

Specific site should be recorded on follow-up form.

A tumor in the other breast is not considered a loco-regional treatment failure.

ATTENTION: according to UICC guidelines 1987 supra-clavicular lymph node metastases are considered distant failures, however for consistency to our previous protocols we will continue to consider these as regional metastases.

Criteria:

acceptable: positive cytology or histology or progression of disease (UICC criteria) if only indirect methods were used (e.g., x-ray)

suspicious: a visible or palpable lesion

6.1.2 Distant failures

Tumors in all areas other than those mentioned above (6.1.1) are considered distant metastases.

Criteria

Opposite breast or supraclavicular nodes

acceptable: positive cytology or histology

suspicious: a visible or palpable lesion

Bone marrow

acceptable: positive cytology, aspiration or drill biopsy

suspicious: unexplained depression of peripheral counts  
and/or erythroblastic blood picture

Lung and/or pleura

(should be distinctly specified)

acceptable: positive cytology or histology or presence of  
progressive lesion(s) on two successive X-rays  
or CT scans in the absence of constitutional  
symptoms

suspicious: a new lesion on an X-ray

Bone

acceptable: positive cytology or histology or a positive  
X-ray, or two bone scans performed at least  
3 months apart, which show progressive changes

suspicious: skeletal symptoms or positive scan and bone  
X-ray excluding benign lesions as possible  
cause

Liver

acceptable: positive cytology or histology or progressive  
changes in liver ultrasound, or CT scan

suspicious: any two of the following: hepatomegaly by  
physical examination, abnormal liver scan,  
abnormal liver function test (especially  
increase of gamma-GT), pathological ultra-  
sound or CT scan

Central nervous system

acceptable: positive biopsy or cytology or symptoms plus a diagnostic brain scan, or positive CT scan

suspicious: any other clinical findings suggestive of this diagnosis

Distant soft tissue (e.g., skin, other than local) and other organs

acceptable: positive biopsy or cytology or progressive manifestations (UICC criteria) if only indirect methods were used (e.g., X-ray)

suspicious: clinical and radiological evidence of a tumor

6.2 Treatment Failure

6.2.1 Local Treatment Failure

Acceptable evidence of tumor in any soft tissues of the ipsilateral chest wall, operative scar or breast, if a less than total mastectomy procedure was performed. This includes the area bounded by the midline of the sternum, superiorly by the clavicle, along the lateral edge of latissimus dorsi and inferiorly, the costal margin. A soft tissue recurrence in this area extending into the bony chest wall or across the midline will still be considered as evidence of local treatment failure.

Special consideration should be given to the documentation of local recurrence after less than mastectomy procedures.

The following information should be submitted:

- a. the extension of relapse
- b. the treatment procedure
- c. a histology report in cases of biopsy or surgical removal of recurrence, along with a description of any tumor tissue not surgically removed; and

- d. results of the hormone receptor assay performed on the recurrence (submitted on Form F).

6.2.2 Regional Treatment Failure

Evidence of tumor in the ipsilateral internal mammary, supraclavicular and/or axillary nodes and/or in the soft tissue of the axilla.

6.2.3 Distant Treatment Failure

Evidence of tumor in all areas except those described above (6.2.1 and 6.2.2).

6.3 Survival

Survival will be measured from the date of randomization.

6.4 Morbidity

Information will be recorded relative to any complications.

7. STUDY PARAMETERS (See Table 7.6)

It is vital that follow-up be regular, accurate and disciplined, if meaningful and worthwhile information is to be obtained.

- 7.1 The aim of the follow-up is to determine the time of tumor recurrence and the duration of patient survival.

- 7.2 Information will be recorded at regular intervals.

- 7.3 The day of randomization is considered Day 0 for the purpose of follow-up. All patients will be followed-up in each clinic after every CMF administration or every three months during tamoxifen administration. Follow-up is required every third month during the first two years, every six months for the next three years, and yearly thereafter. The follow-up form (Form E) is filled out at the time of each scheduled visit (see Section 10. for the timing of submission of the forms) and sent to the Operations Office.
- 7.4 All patients will be followed and evaluated at the same intervals, regardless of treatment assignment.
- 7.5 Morbidity of treatments
- Toxicity must be recorded on Form D according to the grades defined in Appendix II. The Form C must include all complications occurring in the postoperative period.
- 7.6 Required investigations
- See Table 7.6 on next page.
8. PATHOLOGY (tentative)
- The responsible pathologist in each center must be identified. The inclusion of each patient into the trial is dependent upon accurate assessment of the status of axillary lymph nodes. All grossly negative lymph nodes must be examined from each patient.

The work of the pathologist is basic to the success of this study and includes the diagnosis, classification and

7.6 TABLE OF STUDY PARAMETERS

| REQUIRED                              | Prior to Rand. | Days 1 & 8 of Cycle During Cytotoxic CT                   | Days 9 - 21 of Cycle During CT | Every 3 Mos. First 2 Years | Every 6 Mos. Years 3-5 | Every 12 Mos. After Year 5          |
|---------------------------------------|----------------|-----------------------------------------------------------|--------------------------------|----------------------------|------------------------|-------------------------------------|
| History & Physical Examination        | X              | X                                                         | X                              | Y                          | Y                      | Y                                   |
| <u>Hematology:</u>                    |                |                                                           |                                |                            |                        |                                     |
| HGB or HCT                            | X              | X                                                         | X                              | Y                          | Y                      | X                                   |
| WBC                                   | X              | X                                                         | X                              | Y                          | Y                      | Y                                   |
| Platelet Count                        | X              | X                                                         | X                              | Y                          | Y                      | Y                                   |
| Serum (see §.6.2)                     |                | X (day 1)                                                 |                                | Y (after therapy)          |                        |                                     |
| <u>Chemistries:</u>                   |                |                                                           |                                |                            |                        |                                     |
| Serum Creatinine & BUN                | X              |                                                           |                                | Y                          | Y                      | Y                                   |
| Bilirubin                             | X              |                                                           |                                | Y                          | Y                      | Y                                   |
| Alkaline Phosphatase                  | X              |                                                           |                                | Y                          | Y                      | Y                                   |
| SGOT or SGPT                          | X              |                                                           |                                | Y                          | Y                      | Y                                   |
| Gamma-GT                              | X              |                                                           |                                | Y                          | Y                      | Y                                   |
| Serum Calcium                         | X              |                                                           |                                | Y                          | Y                      | Y                                   |
| <u>X-Rays / Scans:</u>                |                |                                                           |                                |                            |                        |                                     |
| Chest (PA and Lateral)                | X <sup>3</sup> |                                                           |                                | Y <sup>4</sup>             |                        |                                     |
| Xeromammogram or Mammogram            | X <sup>3</sup> | and then 1x yearly <sup>3</sup>                           |                                |                            | Y                      | Y                                   |
| CAT Scan or Ultrasound of the liver   | X <sup>3</sup> |                                                           |                                |                            |                        |                                     |
| Bone Scan (Bone X-Ray) <sup>2,3</sup> |                | - within 1 month of mastectomy and once yearly thereafter |                                |                            | Y <sup>3</sup>         | Y <sup>3</sup>                      |
| <u>Quality-of-Life Evaluation</u>     |                | X (day 1 of therapy)                                      |                                |                            |                        | X (as per Quality-of-Life protocol) |

Hormone Receptors: must be determined on primary tumor; and when possible, at recurrent disease.  
 X = For all patients prior to and during treatment time.  
 Y = All patients.

2 = If hot spots: X-Ray of suspicious areas must be performed. If bone scan without demonstrable disease, repeat scan within 3 months.  
 3 = Optional  
 4 = Only once

grading of the primary tumor, evaluation of the non-tumor breast tissue and local spread as found in the biopsy and/or mastectomy specimen, including precise documentation of the total number of examined lymph nodes.

For the pathology study of the mastectomy specimen a standardized procedure is suggested, including the preparation for forwarding of a set of slides, blocks and a copy of the clinic/hospital pathology report, and pathology form (Form P) and the Pathology Transmittal Form (Form PTF) to the Operations Office.

The intent of this paragraph is to describe what should be performed and which items should be submitted for a central review. Ludwig V will hopefully provide indications regarding the extent of pathological work-up of the axillary nodes. We should therefore not attempt to repeat the review performed in Ludwig V but rather plan for a tumor-biology oriented research program.

Special studies will be done according to protocol prepared by pathologists.

A block or 5 unstained slides containing some of the primary tumor and 2 or 3 blocks (or 5 unstained slides per block) containing representative negative nodes should be submitted together with one representative slide of the primary tumor to the Operations Office (accompanied by a PTF-Form).

Guidelines are presented below.

8.1 Preparation of Specimen

Tissue for hormone receptor determination is removed and prepared (if not already performed).

8.1.1 The location of the tumor by breast quadrant and its relationship to the skin and fascia must be recorded.

8.1.2 The greatest three dimensions of the tumor should be measured (unfixed specimen). Record it on your report.

8.2 Fixative

As routinely done in your institution. For special studies: see respective protocol.

Whenever possible a sample of primary tumor (0.5 g) and a sample of non-tumorous breast should be snap frozen without prior fixation and stored at  $-70^{\circ}$ .

8.3 Sampling

8.3.1 Primary tumor

One block (or 5 unstained slides) of primary tumor should be submitted. One stained slide of the primary should be submitted.

8.3.2 Other tissue from mastectomy specimen

A non-tumor tissue block submission is warranted (optional).

8.3.3 Lymph nodes

Representative lymph nodes (at least 2) should be submitted as a block to central review. Five unstained slides per block may be submitted instead of the blocks.



Dissection of the nodes can be undertaken before or after fixation of the specimen.

Whenever possible, the axillary fat should be divided into upper and lower parts, utilizing the sutures placed by the surgeon.

Remarks:

Care should be taken during excision and handling of lymph nodes, as compression of tissue during the procedure can result in distortion. Forceps should be applied only to the surrounding tissue and not to the node. The node should be removed intact rather than in fragments.

8.4 Embedding and Sectioning

Embed in paraffin or paraplast.

8.5 Staining and Mounting

Routine staining using H & E method is the accepted standard. Routine mounting on glass slides covered with glass slips is the accepted standard.

8.6 Central Pathology Review

Goal: To verify and establish uniform diagnoses in all cases. To correlate pathological and biological findings with clinical course of the disease.

8.7 Objectives

- a. To receive:
  - aa. A copy of the hospital/clinic pathology report.
  - ab. A summary of the hospital/clinic pathology findings as provided on Form P.
  - ac. A set of slides from tumor ( and non-tumor) tissue.
  - ad. Representative blocks (or unstained slides) of each of the following:
    - 1. tumor
    - 2. non-cancerous breast (optional)
    - 3. negative lymph nodes.
- b. To classify all carcinomas using WHO classification.
- c. To use the material for innovative studies to be defined.
- d. To submit finding to Statistical Center.
- e. To report the results of all studies back to the contributing pathologist on a regular basis.
- f. To be available for discussion and consultation with reference to any questions about the pathology of any case.
- g. To present the pathology data at the Group's meeting.
- h. To publish the results of the findings in the name of the Group.

9. STATISTICAL CONSIDERATIONS

Trial IX

This study is designed to test the following questions concerning the role of adjuvant systemic therapy for postmenopausal patients with operable breast cancer and negative axillary lymph nodes: Is the addition of 3 initial cycles of oral CMF administered prior to continuous adjuvant tamoxifen more effective than continuous tamoxifen alone?

Patients are randomized to receive one of two treatment programs as described in paragraph 4.3.2. The pairwise comparison of F vs. E will be evaluated.

The primary endpoint for evaluation of therapeutic impact will be disease-free survival (DFS) where all relapses (with special consideration of breast recurrence after breast conserving procedures), second primary tumors, and deaths without recurrence are counted as failures. Overall survival, patterns of relapse, and treatment-related side effects will also be assessed. Systemic disease-free survival will be monitored throughout the trial for possible early termination of patient entry.

For the purpose of sample size calculation, the baseline five-years DFS percentage for patients who enter this study and receive adjuvant tamoxifen therapy is assumed to be approximately 75% (based on the NATO trial). The table below shows the total number of patients and total number of failures required to detect specified differences in 5-year DFS with 80% power using a two-sided  $\alpha=0.05$  logrank test. It is assumed that the analyses are performed at a time when about 20% of the patients in the trial have failed.

Number of patients\* Required to Achieve 80% Power  
Using a Two-Sided Alpha=0.05 Logrank Test to Detect  
Specified Differences in 5-Year DFS Percentage Relative  
to a Baseline Percentage of 75%.

---

| Differences<br>in 5-Year<br>DFS % | Total number<br>of Patients<br>in the Trial | Total Number<br>of Failures |
|-----------------------------------|---------------------------------------------|-----------------------------|
| 75%-80%                           | 2190                                        | 492                         |
| 75%-81%                           | 1495                                        | 329                         |
| 75%-82%                           | 1084                                        | 233                         |
| 75%-83%                           | 819                                         | 172                         |
| 75%-84%                           | 640                                         | 131                         |
| 75%-85%                           | 510                                         | 102                         |
| 75%-86%                           | 416                                         | 81                          |
| 75%-87%                           | 343                                         | 65                          |
| 75%-88%                           | 285                                         | 53                          |

---

\* Based on Freedman, L.S. Tables of the number of patients required in clinical trials using the logrank test. Statistics in Medicine I:121-129, 1982.

The yearly accrual of node-negative, postmenopausal patients in Ludwig V was 140/year. Because patients can enter Trial IX up to 6 weeks following local treatment, we anticipate the accrual rate to be 225 per year.

The table below shows the relationship between patient entry, accrual and follow-up periods, and differences in 5-year DFS percentage that can be detected with 80% power. Nine hundred patients will be accrued over a period of 4 years (as anticipated from Ludwig V) with an additional follow-up of at least 5 years after the last entry.

Number of Patients, Accrual and Follow-up Times (Assuming 225/year) and 5-Year DFS Percentage Differences for the Treatment Comparison Detectable with 80% Power.

---

|              | 900 Patients<br>(4 years of Accrual)<br>(+ 5 Years of Follow-up) |                               |
|--------------|------------------------------------------------------------------|-------------------------------|
|              | Total Number<br>of Patients                                      | DFS Percentage<br>Differences |
| All patients | 900                                                              | 7.5 %                         |
| ER Positive  | 600                                                              | 9.0 %                         |
| ER Negative  | 300                                                              | 12.5 %                        |

---

10. RECORDS TO BE KEPT

The keeping of accurate and consistent records is essential to a cooperative study.

The following forms are to be submitted at the indicated times by the participating Institutions for each patient:

- |        |                                |                                                                                                                                |
|--------|--------------------------------|--------------------------------------------------------------------------------------------------------------------------------|
| Form B | Clinical and Preoperative Form | - Submitted within one month of resection                                                                                      |
| Form C | Surgery form                   | - After complete post-operative recovery.<br>Document all post-operative complications giving etiology, treatment and outcome. |

- Form P Pathology Form - Completed by pathologists and submitted with a copy of the clinic pathology report within 3 months after randomization.
- Form PTF Pathology Transmittal Form - To be sent within 3 months of randomization with slides, blocks, clinic pathology report, and P Form
- Form D Treatment and Morbidity Form - At the completion of every 3 cycles (or 3 months) of adjuvant therapy.
- Form E Follow-up Form - Commencing at 3 months post-randomization, then submitted every 3 months during the first 2 years, every 6 months during the next 3 years, and yearly thereafter.
- Form F Hormone receptor Analysis Form - At surgery and at each recurrence of disease (whenever a hormone receptor analysis is performed).
- Form QL Quality of life Form - To be completed on day 1 of therapy, on day 1 of the third cycle of CMF or eighth week of tamoxifen alone, then every 3 months for the next 2 years. A QL

Form should also be completed one month after relapse of any type.

- |         |                     |                                                       |
|---------|---------------------|-------------------------------------------------------|
| Form NC | Non-Compliance Form | - To be completed when QL Form will not be submitted. |
| Form R  | Radiotherapy        | - To be completed at the end of radiotherapy.         |

10.1 Submission of Forms

After completion of each form, the bottom (pink) copy should be removed and kept on file at the participating institution. The two remaining copies (the top white and the middle yellow copies) should be sent to

International Breast Cancer Studies  
Operations Office  
Seidenweg 63  
CH-3012 Bern, Switzerland.

11. REFERENCES

1. UK-BCTCS/UICC/WHO: Review of mortality results in randomized trials in early breast cancer. *Lancet* ii:1205, 1984.
2. Ludwig Breast Cancer Study Group: Randomized trial of chemo endocrine therapy, endocrine therapy, and mastectomy alone in postmenopausal patients with operable breast cancer and axillary node metastasis. *Lancet* i:1256-1260, 1984.
3. Rose C, Thorpe SM, Andersen KW, Pedersen BV, Mouridsen HT, Blichert-Toft M, Rasmussen BB: Beneficial effect of adjuvant tamoxifen therapy in primary breast cancer patients with high oestrogen receptor values. *Lancet* i:16-19, 1985.
4. Goldhirsch A, Gelber RD, Tattersall MNH, Rudenstam CM, Cavalli F, for the Ludwig Breast Cancer Study Group. Endocrine adjuvant therapy for breast cancer. *Lancet* i:1274, 1985.
5. Pritchard KI, Meakin JW, Boyd NF, Ambus U, DeBoer G, Dembo AJ, Paterson AHG, Sutherland DJA, Wilkinson RH, Bassett AA, Evans WK, Beale FA, Clark RM, Keane TJ, for the Toronto-Edmonton Breast Cancer Study Group. A randomized trial of adjuvant tamoxifen in postmenopausal women with axillary node positive breast cancer. In: S.E. Jones and S.E. Salmon (eds) *Adjuvant Therapy of Cancer IV*, eds. Grune and Stratton, Orlando, 339-347, 1984.
6. Taylor IV, SG, Olsen JE, Cummings FJ, Knuiman M: Observation compared to adjuvant chemo-hormonotherapy in postmenopausal breast cancer: the ECOG trial. *Proceedings of the American Society of Clinical Oncology* 4: 61 (Abst. C-235), 1985.



7. Baum M: Nolvadex Adjuvant Trial Organisation - controlled trial of tamoxifen as single agent in management of early breast cancer: analysis at 6 years. Lancet i:836-839, 1985.
8. Fisher B, Bauer M, Margolese R, Poisson R, Pilch Y, Redmond C, Fisher E, Wolmark N, Deutsch M, Montague E, Saffer E, Wickerham L, Lerner H, Glass A, Shibata H, Deckers P, Ketcham A, Oishi R, Russell I: Five-year results of a randomized clinical trial comparing total mastectomy and segmental mastectomy with or without radiation in the treatment of breast cancer. N Engl J Med 312:665, 1985.
9. Fisher, B, Wolmark N: Limited surgical management for primary breast cancer: a commentary on the NSABP reports. W Jr Surg 9:682-691, 1985.
10. Veronesi U, Saccozzi R, Del Vecchio M, Banfi A, Clemente C, De Lena M, Gallus G, Greco M, Luini A, Marubini E, Muscolino G, Rilke F, Salvadori B, Zecchini A, Zucali R: Comparing radical mastectomy with quadrantectomy, axillary dissection, and radiotherapy in patients with small cancers of the breast. N Engl J Med 305;6, 1981.
11. Veronesi U, Zucali R, Del Vecchio M: Conservative treatment of breast cancer with the Q.U.A.R.T. technique. W Jr Sug 9:676-681, 1985.
12. van Dongen JA, Bartelink H, Aaronson N, Fentiman I, Hayward JL, Lerut T, Millis R, Olthuis G, Peterse JL, Rotmensz M, v.d. Shueran E, Sylvester R, The SK, Winter J, van Zyl K, for the EORTC Breast Cancer Cooperative Group: Randomized clinical trial to assess the value of breast conserving therapy (BCT) in Stage I and Stage II breast cancer: EORTC Trail 10801.

Proceedings of the 4th European Conference on Clinical  
Oncology and Cancer Nursing, ECCO 4, Abstr, 394, Madrid, 1-4  
Nov, 1987.

## RADIATION THERAPY FOLLOWING SEGMENTAL MASTECTOMY

Appendix I

Since the local therapy is not the prime question of these studies, details will be left to the discretion of participating institutions provided that (i) timing follows outlines given in the protocol, and (ii) therapy is NOT directed to axilla or supraclavicular nodes and only to the parasternal nodes as required to cover the breast. Radiation following segmental mastectomy is intended to be delivered in a cancericidal dose to all remaining ipsilateral breast tissue. The dose is chosen to produce sterilization of occult tumor foci which may possibly be present in the residual breast tissue following segmental mastectomy and in order to avoid distortion or fibrosis of the breast as a result of radiation. The following guidelines are offered as a suggestion. Radiotherapists are encouraged to contact Professor Arne Wallgren concerning details of their own techniques.

### 1. Area to be treated and technique

It is the intent of radiation therapy to treat the skin, breast tissue, and entire scar of the breast. No attempt will be made to include axillary, supraclavicular, inter-pectoral and internal mammary lymphnodes. The latter lie at the medial edge of the treatment field and may sometimes either partially or wholly be included. No special attempt should be made to exclude these since this would interfere with irradiation of the entirety of the breast.

When segmental mastectomy and axillary dissection are performed through separate incisions, if the scar of the axillary dissection is extrinsic to the breast, no irradiation will be specifically directed to that scar.

If the axillary dissection scar is in continuity with that of the segmental mastectomy, no special attempt will be made to irradiate that portion of the scar which is beyond the breast tissue.

- A. Position of the Patient. Patient lies supine, straight (no pillows are used unless dorsal convexity of patient is extreme), upper arm abducted  $90^\circ$  with forearm supported in upright position by vertical arm board. If CT-scans are used for individual planning purpose, the arm may have to be abducted  $180^\circ$  and rest above the head for this investigation. The same position should then be used during the treatment.
- B. Description of Radiation Field. The breast (and the chest wall) are treated through opposing tangential fields to avoid direct irradiation of the lung. Beam splitting devices or an outward tilting of the fields of approximately  $5^\circ$  may be recommended to reduce the dose in the lung.

If no individual planning of doses is performed the following guide-lines should apply:

The medial border lies along the midsternal line.

The lateral border lies along the mid-axillary line. If the scar extends beyond this line, the lateral border may, within limits, be moved posteriorly to include the entire scar. The extent to which this line may be moved posteriorly should be guided by the amount of lung tissue which would be irradiated if this border is parallel-opposed to the medial border. If the irradiated slice of lung tissue exceeds a width of 5 cm, the lateral portal should be left along the mid-axillary line and the end of the surgical scar treated by superficial irradiation.

The inferior border of the tangential field is drawn horizontally across the hemithorax at a level about 2 cm, below the inframammary fold. This line can be drawn by extension from the contralateral fold if the ipsilateral breast is distorted.

The superior border is located along a horizontal line which bisects the sterno-manubrial junction (angle of Louis). If necessary, this border may be moved superiorly to be sure that the entire breast and the tail of the breast are included. If the scar extends above this boundary, the line should be moved superiorly so as to include it entirely.

- C. Breast Target and Field Boundaries. If individual planning of the fields is performed the boundaries of the target area have to be determined individually using all available information. What was above described about including the scar is also applicable in the individual dose planning.
- D. Angle of Tangential Fields. The angle of the tangential treatment fields can be determined with a rolling ball, inclinometer bridge, or by rotating the head of the machine until the back pointer and the front pointer lie respectively on the lateral or medial field boundaries. Beam splitting devices or tilting of the fields about  $5^\circ$  according to an individual plan may decrease the dose in the lung. It is also essential to rotate the collimator in order to include all breast tissue and remove as far as possible lung tissue from the irradiated volume. The fields should be wide enough to irradiate at least 1 cm of air outside the breast.
- E. Verification of Irradiated Volume. Preferably the field set-up should be done on a radiation simulator. Verification films should also be taken in treatment position with a treatment beam. If more than 5 cm of lung tissue is included in the beam the lateral field boundary is probably located too far posteriorly.
- F. SSD: 80 cm or more.

2. Dosage and Time of Onset

- A. Time of Onset of Therapy. The study concerns differences in the scheduling of chemotherapy. In order not to interfere with this study and make these patients comparable to those treated by a total mastectomy, irradiation should be started 2 weeks after the last chemotherapy course, or within 3 months from the start of tamoxifen therapy for patients receiving tamoxifen alone.
- B. Dose. A minimum dose of 50 Gy should be given. This dose is calculated at a specification point at a depth of two-thirds distance between the skin overlying the breast and the base of the tangential fields at mid-separation. This point should not be located in lung tissue. This depth generally ranges from 3 - 7 cm.
- C. Dose Fractionation. The dose is given at a rate of 10 Gy per week (daily increments of 2 Gy per day, 5 days per week with no split) calculated at the minimum dose point. Both tangential fields will be treated daily, 1 Gy, T.D. given to each.

TOXICITY GRADING

Appendix II

Please use the following table when reporting complications. Any life-threatening toxicity attributable to treatment should be reported to the study coordinator immediately. For any toxicity not specifically described, grades correspond to the following terms: 1: mild; 2: moderate; 3: severe; 4: life-threatening.

| CODES* | 0                |                |                         |                           |                                  | 1                                |           |                            |                         | 2                         |                                  |                               | 3                                |                     | 4                          |                           |                  |                                    |
|--------|------------------|----------------|-------------------------|---------------------------|----------------------------------|----------------------------------|-----------|----------------------------|-------------------------|---------------------------|----------------------------------|-------------------------------|----------------------------------|---------------------|----------------------------|---------------------------|------------------|------------------------------------|
|        | WBC              | Leukopenia     | ≥ 4000                  | 2500 - 3999               | 1000 - 2499                      | < 1000                           | Platelets | Thrombocytopenia           | ≥ 100000                | 75000 - 99999             | 50000 - 74999                    | < 50000                       | N                                | Nausea & Vomiting   | N & V controllable         | Vomiting intractable      |                  |                                    |
| D      | Diarrhea         | No dehydration | No dehydration          | Soreness                  | Ulcers - can eat                 | Grossly bloody                   | S/M       | Stomatitis / Mucositis     | Asymptomatic Hb 10 - 11 | Slight symptoms Hb 8 - 10 | Symptoms - transfusions required | Ulcers - cannot eat           | Symptoms - transfusions required | Ulcers - cannot eat | Ulcers - cannot eat        | Ulcers - cannot eat       |                  |                                    |
| 11     | Anemia           | Hb > 11        | Asymptomatic Hb 10 - 11 | Slight symptoms Hb 8 - 10 | Symptoms - transfusions required | Symptoms - transfusions required | 12        | Neutropenia                | 1500 - 1900             | 750 - 1499                | < 750                            | 13                            | Hemorrhage (non-vaginal)         | Minimal             | Moderate; not debilitating | Debilitating              | Life-threatening |                                    |
| 14     | Vaginal Bleeding | Mild           | Mild                    | Moderate                  | Severe                           | Severe                           | 15        | Infection (local systemic) | No active treatment     | Active treatment required | Major intervention required      | Life-threatening septic shock | 16                               | Anorexia            | Complete food aversion     | Controlled with treatment | Epigastric pain  | Occasional - no treatment required |

\* FORM D only

CODES\*

0 1 2 3 4

| 18 | Pulmonary                       | 0                                                                                                                                                                      | 1                                                                   | 2                                                                                   | 3                                                                                             | 4                                                                                                                    |
|----|---------------------------------|------------------------------------------------------------------------------------------------------------------------------------------------------------------------|---------------------------------------------------------------------|-------------------------------------------------------------------------------------|-----------------------------------------------------------------------------------------------|----------------------------------------------------------------------------------------------------------------------|
|    |                                 |                                                                                                                                                                        | Mild symptoms                                                       | Moderate symptoms                                                                   | Severe symptoms<br>Intermittent O <sub>2</sub>                                                | Assisted vent or<br>continuous O <sub>2</sub>                                                                        |
| 19 | Neurological:<br>CNS            | (Pneumonia is considered an infection and should not be graded as pulmonary toxicity unless felt to be resultant from pulmonary changes directly induced by treatment) |                                                                     |                                                                                     |                                                                                               |                                                                                                                      |
|    |                                 |                                                                                                                                                                        | Mild anxiety, mild headache, insomnia, fatigue, malaise             | Mild hyperactivity, severe anxiety, moderate headache, somnolence, tremor           | Confused or manic, severe headache, cord dysfunction, confined to bed due to CNS dysfunction. | Seizures, suicidal, coma                                                                                             |
|    | PN                              |                                                                                                                                                                        | Decreased deep tendon reflexes, mild paresthesia, mild constipation | Absent deep tendon reflexes, mild weakness, severe paresthesia, severe constipation | Disabling sensory loss, constipation, severe weakness, bladder dysfunction, severe PN pain    | Respiratory dysfunction, 2° weakness, constipation requiring surgery, paralysis confining patient to bed, wheelchair |
| 20 | Depression                      |                                                                                                                                                                        | Occasional                                                          | Controlled by treatment                                                             | Uncontrollable                                                                                | Suicidal                                                                                                             |
| 21 | Skin (Allergic)                 |                                                                                                                                                                        | Transient erythema                                                  | Vesiculation                                                                        | Ulceration                                                                                    |                                                                                                                      |
| 22 | Alopecia                        |                                                                                                                                                                        | Partial                                                             | Complete                                                                            |                                                                                               |                                                                                                                      |
| 23 | Renal:<br>BUN mg%<br>Creatinine | ≤ 20<br>< 1.2                                                                                                                                                          | 21 - 40<br>1.3 - 2.0                                                | 41 - 60<br>2.1 - 4.0                                                                | > 60<br>> 4.0                                                                                 | Symptomatic<br>Uremia                                                                                                |
| 24 | Cystitis                        |                                                                                                                                                                        | Mild                                                                | Moderate                                                                            | Severe (hemorrhagic)                                                                          | Life-threatening                                                                                                     |
|    |                                 | (Urinary tract infection should be graded under Infection (Code 15). Hematuria resulting from thrombocytopenia is graded under Hemorrhage (Code 13)).                  |                                                                     |                                                                                     |                                                                                               |                                                                                                                      |

\* FORM D only



CODES\*

4

3

2

1

0

|                                                                                   | 0                                               | 1                                   | 2                                                        | 3                                                           | 4                                                                                                    |
|-----------------------------------------------------------------------------------|-------------------------------------------------|-------------------------------------|----------------------------------------------------------|-------------------------------------------------------------|------------------------------------------------------------------------------------------------------|
| 25                                                                                | Hepatic:<br>SGOT<br>Alkaline phos.<br>Bilirubin | <1.5 x nl<br><1.5 x nl<br><1.5 x nl | 1.5 - 2 x normal<br>1.5 - 2 x normal<br>1.5 - 2 x normal | 2.1 - 5 x normal<br>2.1 - 5 x normal<br>2.1 - 5 x normal    | > 5 x normal<br>> 5 x normal<br>> 5 x normal                                                         |
| (Viral hepatitis should be recorded as Infection (15) rather than liver toxicity) |                                                 |                                     |                                                          |                                                             |                                                                                                      |
| 26                                                                                | Headache                                        |                                     | Occasional, mild                                         | Constant, mild                                              | Severe                                                                                               |
| 27                                                                                | Muscle weakness                                 |                                     | Slight                                                   | Moderate                                                    | Severe, debilitating                                                                                 |
| 28                                                                                | Hyperglycemia:<br>Non-diabetic                  |                                     | Glycemia<br>140 - 180 mg%                                | Glycemia<br>> 180 mg%,<br>controllable<br>with diet         | Requiring<br>insulin<br><br>Keto-acidosis                                                            |
|                                                                                   | Diabetic                                        |                                     | Adjustable<br>with diet                                  | Requiring < 25%<br>increase in<br>insulin dosage            | Requiring > 25%<br>increase in<br>insulin dosage<br><br>Keto-acidosis                                |
| 29                                                                                | Hypercalcemia                                   |                                     | < 2.6 mmol/l                                             | 2.6 - 3.0 mmol/l,<br>without symptoms                       | < 3.0 mmol/l,<br>with symptoms<br><br>> 3.0 mmol/l, with<br>or without symptoms                      |
| 30                                                                                | Hypertension:<br>Pre-existing                   |                                     | Hypertension<br>controlled by<br>occasional<br>treatment | Hypertension<br>controlled by<br>chronic oral<br>medication | Requiring hospi-<br>talisation, treat-<br>ment with i.v.<br>drugs<br><br>Uncontrollable              |
| 31                                                                                | Hot flashes                                     |                                     | Occasional -<br>not requiring<br>treatment               | Frequent -<br>requiring<br>treatment                        |                                                                                                      |
| 32                                                                                | Euphoria                                        |                                     | Slight                                                   | Moderate                                                    | Severe                                                                                               |
| 33                                                                                | Thrombosis,<br>Phlebitis,<br>Embolism           |                                     | Local, oligo-<br>symptomatic                             | Painful, with or<br>without edema                           | Severe edema,<br>dyspnea (no O <sub>2</sub> )<br><br>Pulmonary embolism,<br>requiring O <sub>2</sub> |

\* FROM 0 ONLY

CODES \*

0 1 2 3 4

|    | 0                              | 1                         | 2                         | 3                                          | 4 |
|----|--------------------------------|---------------------------|---------------------------|--------------------------------------------|---|
| 34 | Edema                          | Not debilitating          | Debilitating              |                                            |   |
| 35 | Lymphedema                     | Not debilitating          | Debilitating              |                                            |   |
| 36 | Weight gain (not Edema)        | < 5% body weight          | 5 - 10% body weight       | > 10% body weight                          |   |
| 37 | Eye disorders                  | Tearing                   | Tearing and pain          | Objective lesion (e.g. punctate keratitis) |   |
| 38 | Joint pain                     | Slight                    | Moderate                  | Severe                                     |   |
| 39 | Wound healing                  | Delayed less than 4 weeks | Delayed more than 4 weeks | Major intervention required                |   |
| 40 | Amenorrhea (treatment-induced) | No period                 |                           |                                            |   |

\* FORM D only

1. Introduction

Preliminary findings of recent prospective studies suggest that the initial psychosocial reaction of breast cancer patients at diagnosis may be a prognostic indicator of outcome (1,2,3,4). Patients showing a strong emotional coping reaction seem to do better than patients who deny having any difficulties. On the other hand patients with initial helplessness/hopelessness (low level of well-being) seem to do worse. As there are contradictory results (5), further studies may clarify the controversy (6).

In addition to the traditional measures of outcome (disease-free survival, overall survival) the assessment of different aspects of quality of life is considered in clinical trials. The goal is to improve quantity and quality of survival. This is of special importance in the adjuvant situation.

2. Objectives

There are two hypotheses to evaluate:

1. The level of early coping/well-being of the patient at diagnosis can be used as a prognostic indicator of outcome.
2. The coping/well-being of the patients is different for different treatment arms.

The first hypothesis is tested in a longitudinal design for all patients, independent of the differing treatment arms, with one measurement of coping/well-being within the first 6 weeks after definitive surgery. So far an eventual prognostic psychosocial factor has never been tested in such a large sample with biologically well-defined subgroups. The second hypothesis is evaluated by comparison of different groups with serial measurements of coping/well-being over time. The longitudinal assessments of global coping/well-being is considered as a new endpoint in the evaluation of clinical trials with breast cancer patients. The questionnaire does not evaluate observer-selected criteria such as disease symptoms, but rather the patients' subjective appraisal of their well-being and amount of adjustment needed to cope with their illness - a central issue absent in most other studies. The evaluation of the two hypotheses separately for each study may clarify how the subtle differences of the biological subgroups may influence psychosocial factors.

### 3. Methods

#### a. Measurement instruments:

To assess coping, the SLCU (Subjective Life Change Unit Score), a simple self-assessment scale developed by Rahe (7), is used. The patient is asked to rate the amount of adjustment needed to cope with her illness on a scale from 0 to 100. The scale has been used with good compliance in the Swiss subset of patients in Ludwig Study V and in several other studies with cancer patients (5,8,9,10). Rogentine et al. (8) found in a prospective study of melanoma patients that the amount of adjustment needed to cope with this illness (SLCU)

is a valid prognostic factor in predicting one-year disease-free survival post-operatively.

Well-being is assessed by the Bf-S, a short, self-administered adjective checklist with well-documented psychometric properties developed by v. Zerssen (11,12). Our experience with this scale in a lung cancer protocol of the Swiss Cooperative Group (SAKK 15/84) gave us the opportunity to simplify the design of the form for better patient understanding. In a current Swiss study of coping processes in breast cancer patients using this scale, the items numbered 2,9,15,18 and 28 provoked negative reactions in some patients. For this reason we have exchanged these items with generally acceptable items from the parallel version of the scale (Bf-S'). These modifications have been done in consultation with the author of the scale. We are convinced that the changes will contribute to a good compliance. In addition to the Bf-S, important aspects of well-being are assessed by three LASA scales, "Physical well-being", "Mood", and "Appetite". These scales were used by the Australian and the New Zealand Breast Cancer Trail Group, and were proven to be sensitive, feasible and valid (13,14,15).

A general problem in self-assessment of subjective appraisal is the patients' tendency to give socially desirable answers. This has to be considered carefully in a psychosocial study of cancer patients (16). According to the empirical experience with the SLCU (5,8,9,10), the Bf-S (17-20), and the three LASA scales (13,14), no considerable bias is expected.

The use of different languages has considerably reduced the choice of adequate instruments. An important aspect of international quality of life research is the possibility of cross-cultural differences in patient responses.

b. Timing of measurements:

Patients are asked to fill in the questionnaire within six weeks of surgery (e.g. day 1 of treatment), 2 months later (e.g. day 1 of chemotherapy cycle 3, or eight weeks after tamoxifen start) and every three months thereafter for a period of two years. A QL form should be filled in one month after recurrence of any type and 6 months later. Filling in the questionnaire required an average of ten minutes per patient in a comparable study in Switzerland (SAKK 15/84).

4. Feasibility

A comprehensive assessment of quality of life would imply high expenses in research staff and patient time. Because of limitations in an international protocol, the interest has to be focused on only a few aspects of quality of life. This protocol is tailored to the limited possibilities of an international trial. The feasibility is granted by minimal expense in data collection, a questionnaire easily understandable for the patient and available in all 11 languages of the participating centers.

5. References

1. Greer, S., Morris, T. & Pettingale, K.W.: Psychological response to breast cancer: effect on outcome. *Lancet*, 1979, ii, 785-787.
2. Watson, M., Greer, S., Blake, S. & Shrapnell, K.: Reaction to diagnosis of breast cancer. *Cancer*, 1984, 53, 2008-2012.
3. Pettingale, K.W.: Coping and cancer prognosis. *Journal of Psychosomatic Research*, 1984, 28, 363-364.
4. Pettingale, K.W., Morris, T., Greer, S. & Haybittle, J.L.: Mental attitudes to cancer: an additional prognostic factor. *Lancet*, 1985, i, 750.
5. Cassileth, B.R., Lusk, E.J., Miller, D.S., Brown, L.L. & Miller, C.: Psychosocial correlates of survival in advanced malignant disease? *New England Journal of Medicine*, 1985, 312, 1551-1555.
6. Hürny, Ch. & Bernhard, J.: Coping and survival in patients with primary breast cancer: A critical analysis of current research strategies and proposal of a new approach integrating biomedical, psychological and social variables. In: Goldhirsch, A., Senn, H.J. (eds.): *Adjuvant chemotherapy of primary breast cancer. Recent results in cancer research.* Berlin: Springer, in press.

7. Rahe, R.H.: The pathway between subjects' recent life changes and their near-future illness reports: representative results and methodological issues. In: Dohrenwend, B.S. & Dohrenwand, B.P. (eds.): Stressful life events: their nature and effects. New York: Wiley & Sons, 1974.
8. Rogentine, G.N., v. Kammen, D.P., Fox, B.H., Docherty, J.P., Rosenblatt, J.E., Boyd, S.C. & Bunney, W.E.: Psychological factors in the prognosis of malignant melanoma: a prospective study. Psychosomatic Medicine, 1979, 41, 647-655.
9. Kneier, A.W. & Temoshok, C.: Repressive coping reactions in patients with malignant melanoma as compared to cardiovascular disease patients. Journal of Psychosomatic Research, 1984, 28, 145-155.
10. Gotay, C.C.: Why me? Attributions and adjustment by cancer patients and their mates at two stages in the disease process. Social Science and Medicine, 1985, 20, 825-831.
11. Zerksen, D.v.: Klinische Selbstbeurteilungs-Skalen (KSb-S) aus dem Münchener Psychiatrischen Informationssystem (PSYCHIS München). Die Befindlichkeits-Skala - Parallelförmigen Bf-S und Bf-S' - Manual. Weinheim: Beltz, 1976.
12. Zerksen, D.v.: Clinical self-rating scales (CSRS) of the Munich Psychiatric Information System (PSYCHIS München). In: Sartorius N., Ban Th.A. (eds.): Assessment of depression. Berlin: Springer, 1986.



13. Coates, A., Fischer Dillenbeck, C., McNeil, D.R., Kaye, S.B., Sims, K., Fox, R.M., Woods, R.L., Milton, G.W., Solomon, J. & Tattersall, M.H.N. On the receiving end - II. Linear analogue self assessment (LASA) in evaluation of aspects of the quality of life of cancer patients receiving therapy. *European Journal of Cancer and Clinical Oncology*, 1983, 19, 1633 - 1637.
14. Coates, A., Gebski, V., Bishop, J.F., et al.: Improving the quality of life during chemotherapy for advanced breast cancer. A comparison of intermittent and continuous treatment strategies. *New England Journal of Medicine*, 1987, 317, 1490-1495.
15. Boyd, N.F., Selby, P.J., Sutherland, H.J. & Hogg, S.: Measurement of the clinical status of patients with breast cancer: Evidence for the validity of self assessment with linear analogue scales. *Journal of Clinical Epidemiology*, 1988, 41, 243-250.
16. Hürny, Ch., Piasetsky, E., Bagin, R. & Holland, J.: High social desirability in patients being treated for advanced colorectal and bladder cancer. *Journal of Psychosocial Oncology*, 1987, 5, 19-29.
17. Heimann, H., Bobon-Schrod, H., Schmocker, A.M. & Bobon, D.P.: Auto-évaluation de l'humeur par une liste d'adjectifs, la "Befindlichkeits-Skala" (BS) de Zersen. *Encephale n.s.*, 1975, 1, 165-183.

18. Matussek, N., Benkert, O., Fidetzis, K., et al.:  
Wirkung des Anthracenderivats Danitracen (WA 335-BS) im  
Vergleich zu Amitriptylin bei depressiven Patienten.  
Arzneimittel-Forschung, 1976, 26, 1160-1163.
19. Paetz, D., Krüskemper, G. & Gillich, K.H.: Test-  
psychologische Untersuchungen über die Befindlichkeit  
von Patientinnen im Klimakterium während stationärer-  
internistischer Behandlung unter besonderer Berück-  
sichtigung von Oestrogen- und Gestagenwirkung.  
Zeitschrift für Gerontologie, 1975, 8, 358-364.
20. Wenderlein, J.M.: Die Befindlichkeit von Frauen vor  
einer gynäkologischen Untersuchung. Medizinische Welt,  
1976, 27, 1164.

INTERNATIONAL BREAST CANCER STUDIES VI, VII, VIII & IX

QUALITY OF LIFE FORM

- 1) This is not a three-part form. The laminated set of 2 pages should be the only set used for copying. DO NOT MAKE COPIES FROM OTHER COPIES, as the length of the line used for assessment would eventually be distorted by multiple copying. Copies should be sent to affiliated clinics for their use.
- 2) This form is to be completed by the patient herself: ON DAY 1 OF TREATMENT (within 6 weeks of surgery), TWO MONTHS LATER FOR TAMOXIFEN TREATED PATIENTS OR DAY 1 OF CYCLE 3 FOR CMF TREATED PATIENTS AND EVERY 3 MONTHS THEREAFTER FOR THE FIRST 2 YEARS (months 6/9/12/15/18/21/24). For methodological reasons, this schedule has to be followed exactly, neither more nor less assessments:

TIMING:

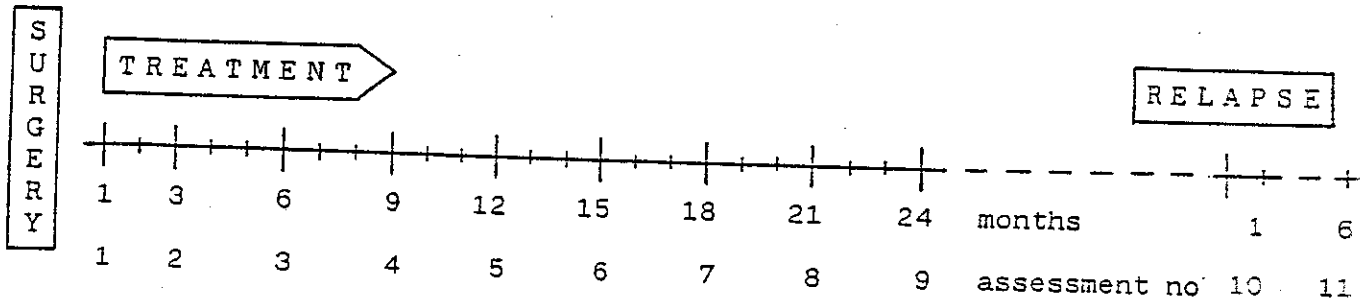

If unavoidable the first assessment may be within 6 weeks of surgery. Subsequent assessments may be  $\pm 1$  month of the 3 month requirement.

Quality of life evaluation has to be performed additionally WITHIN ONE MONTH OF RELAPSE AND 6 MONTHS THEREAFTER ( $\pm 1$  month).

- 3) If chemotherapy is given, the form has to be filled in BEFORE administration of chemotherapy.

- 4) EVERY STUDY PATIENT has to fill in the form, do not select patients for the quality of life study.
- 5) The patient should be instructed to SEEK HELP ONLY IF SHE HAS PROBLEMS in understanding any of the items in the form.
- 6) Page one simply requires an X TO BE MARKED at the place on the line which represents the patient's response to the questions. Leave the left hand column blank.
- 7) Page two requires an X ON EACH LINE in one of the 3 columns. No line should have more than one X! Again this represents the patient's feelings at the present time.
- 8) On both pages ALL QUESTIONS SHOULD BE RESPONDED TO: Check the form after completion and if necessary ask the patient to fill in missing answers.
- 9) If the patient is being followed elsewhere make ARRANGEMENTS WITH THE CLINIC OR PHYSICIAN to have the patient fill in the form as required and send it to you.
- 10) Fill in the header information on each page. If completed elsewhere, please verify the information, especially RANDOMIZATION NUMBER AND DATE OF COMPLETION, before forwarding.
- 11) When completed make a copy for your files and send THE ORIGINAL FORM to the Operations Office in Bern. It will be scored there and forwarded to the Statistical office for data entry.
- 12) If the patient refuses to fill in the form or the form is not filled in for any other reasons ask the patient why and fill in the NONCOMPLIANCE FORM (form NC for investigators).

21.02.87 Hürny, Bernhard  
Quality of Life Office  
Revised 9/88

LIST OF PARTICIPANTS

IBCSG

September 1988

AUCKLAND

Surgeon: Assoc. Prof. R.G. Kay Dept. of Surgery  
School of Medicine  
University of Auckland  
Park Road  
AUCKLAND, New Zealand  
Tel: (00649) 795780 ext. 6246  
Fax: (00649) 770956

Data Manager: Ms. L. Neave Auckland Breast Cancer Study  
Group  
Address as above  
Tel: (00649) 795780 ext. 6263  
Fax: (00649) 770956

Oncologists: Dr. V.J. Harvey Dept. of Clinical Oncology  
Dr. C.S. Benjamin Auckland Hospital  
(Radiotherapy) AUCKLAND 3, New Zealand  
Tel: (00649) 797440 ext. 6250

Hormone Receptors: Assoc. Prof. I.M. Holdaway Dept. of Endocrinology  
Auckland Hospital  
Park Road  
AUCKLAND 3, New Zealand  
Tel: (00649) 797440 ext. 7594

Pathologist: Dr. M. Jagusch Dept. of Pathology  
Greenlane Hospital  
Greenlane Road  
AUCKLAND, New Zealand  
Tel: (00649) 689909 ext. 3927

Surgeons: Mr. J. Carter Gilgit Road Medical Centre  
Mr. J. Gillman 15 Gilgit Road  
EPSOM, Auckland, New Zealand  
Tel: (00649) 604609  
(00649) 604540

Radiologist: Dr. D. Benson-Cooper Dept. of Radiology  
Auckland Hospital  
Park Road  
AUCKLAND, New Zealand  
Tel: (00649) 797440 ext. 7017

Research Officer: Miss B. Mason Dept. of Surgery  
School of Medicine  
University of Auckland  
Park Road  
AUCKLAND, New Zealand  
Tel: (00649) 795780 ext. 6265  
Fax: (00649) 770956

AVIANO

Oncologists: Dr. S. Monfardini  
Dr. E. Galligioni  
Dr. M. Trovo  
Dr.ssa Crivellari  
Centro di Riferimento  
Oncologico  
Via Pedemontana Occ.  
33081 AVIANO, Italy

Surgeons: Dr. C. Rossi  
Dr. Candiani  
Tel: (0434) 652555/652512  
Telex: CERIN I 461277  
Fax: (0434) 652182

Pathologist: Dr. A. Carbone

Hormone Receptors: Dr. G.F. Santini  
Ospedale Civile  
"S. Maria degli Angeli"  
Via Montereale 24  
33170 PORDENONE, Italy  
Tel: (0434) 399281

---

BRESCIA

Oncologists: Dr. G. Marini  
Dr. E. Simoncini  
Dr. P. Marpicati  
Dr. A. Zaniboni  
Dr. F. Gorni  
III Divisione di Medicina  
Fond. Beretta  
Spedali Civili  
25100 BRESCIA, Italy  
Tel: (0039) 3039951, Ext. 260

Surgeons: Prof. U. Sartori  
Dr. A. Barni  
Dr. L. Cerutti  
Dr. A. Alghisi  
Dr. E. Raffaglio  
Dr. M.P. Garattin  
II Chirurgia Generale  
Chirurgia Generale-Gardone V.T.

Hormone Receptors: Prof. A. Albertini  
Dr. G. Mantero  
Laboratorio di Ormonologia

Pathologists: Prof. P. Grigolato  
Dr. L. Morassi  
Dr. C. Baronchelli  
II Servizio di Anatomia  
Patologica

---

CAPE TOWN

Oncologists: Dr. A. Hacking  
Dr. A. Gudgeon  
Groote Schuur Hospital  
Dept. of Radiotherapy  
Observatory  
7925 CAPE TOWN, South Africa  
Tel: (002721) 47 33 11  
Telex: SA (095) 5-20127  
Fax: (002721) 47 89 55

Data Manager: Sr. P. Steynor/LE33

Oncologist: Prof. D.M. Dent  
Dept. of Surgery

Hormone Receptors: Prof. E. Dowdle  
Dept. of Clinical Science

Pathologist: Prof. A. Tiltman  
Dept. of Pathology  
Medical School  
Observatory  
7925 CAPE TOWN, South Africa

---

DUSSELDORF

Oncologist: Dr. H.G. Schnürch

Pathologist: Prof. H. Bender

Universitätsfrauenklinik  
Moorenstrasse 5  
4000 DUSSELDORF 1, W. Germany  
Tel: (0049211) 311-7514/7524  
Telex: 8587348  
Fax: (0049211) 342-229

.....

ESSEN

Oncologists: Prof. C.G. Schmidt  
Dr. F. Schüning  
Prof. K. Höffken

Hormone  
Receptors: Dr. R. Callies

Pathologist: Prof. L.D. Leder

Dept. of Clinical Oncology  
University of Essen  
Tel: (0049201) 7991-2037/  
2011/2024

Universitätsfrauenklinik

Pathology Institute  
University of Essen  
Hufelandstrasse

4300 ESSEN 1, W. Germany  
Telex: 8579573 Klies

---

WEST SWEDISH BREAST CANCER GROUP  
GOETEBORG

Oncologists: Prof. A. Wallgren  
Dr. R. Hultborn  
Dr. G. Kjellberg

Surgeons: Dr. C.-M. Rudenstam  
Dr. E. Cahlin  
Dr. L. Hafström  
Dr. J. Mattsson  
Dr. S. Holmberg

Dr. C. Johnsen

Dr. S. Nilsson  
Dr. J. Fornander

Pathologist: Dr. J. Säve-Söderbergh

Radiologist: Dr. N. Bjurstam

Hormone  
Receptors: Mrs. A. Nilsson

Data  
Managers: Mrs. I. Kärrefors  
Mrs. A.-L. Eckberg  
Mrs. M. Fridell-Björk  
Mrs. B. Sjöstedt

Dept. of General Oncology  
Sahlgren's Hospital

Dept. of Surgery I  
Sahlgren's Hospital  
413 45 GÖTEBORG, Sweden  
Tel: (004631) 602598

Dept. of Surgery  
Västra Frölunda Hospital

Dept. of Surgery  
Ostra Hospital

Dept. of Pathology  
Ostra Hospital

Mammography Section  
Vasa Hospital

Dept. of Clinical Chemistry  
Sahlgren's Hospital

Dept. of Surgery I  
Sahlgren's Hospital  
413 45 GÖTEBORG, Sweden  
Tel: (004631) 601574/601774

GOETEBORG (continued)

|                  |                                                      |                                                   |
|------------------|------------------------------------------------------|---------------------------------------------------|
| Surgeons:        | Dr. L. Ivarsson                                      | Dept. of Surgery<br>Mölnåls Hospital/Mölnådal     |
|                  | Dr. O. Thoren                                        |                                                   |
|                  | Dr. O. Ruusvik                                       | Dept. of Surgery<br>Varbergs Hospital/Varberg     |
|                  | Dr. L.-O. Nilsson                                    |                                                   |
|                  | Dr. S. Dahlin                                        | Dept. of Surgery<br>Lidköpings Hospital/Lidköping |
|                  | Dr. G. Karlsson                                      |                                                   |
|                  | Dr. L. Mattsson                                      | Dept. of Surgery<br>Kungålv Hospital/Kungålv      |
|                  | Dr. A. Sundbäck                                      |                                                   |
|                  | Dr. S. Bergegårdh                                    | Dept. of Surgery<br>Uddevalla Hospital/Uddevalla  |
| Dr. B. Ekelund   |                                                      |                                                   |
| Dr. H. Salander  | Dept. of Surgery<br>Vänernsberg Hospital/Vänernsberg |                                                   |
| Dr. C. Andersson |                                                      |                                                   |
| Dr. Y. Hessman   | Dept. of Surgery<br>Skövde Hospital/Skövde           |                                                   |
| Dr. O. Nelzen    |                                                      |                                                   |
| Dr. N. Johansson | Dept. of Surgery<br>Falköpings Hospital/Falköping    |                                                   |
| Dr. L. Wåhlby    |                                                      |                                                   |

---

LJUBLJANA

|                       |                 |                                                                                                |
|-----------------------|-----------------|------------------------------------------------------------------------------------------------|
| Oncologists:          | Dr. J. Lindtner | Dept. of Surgery                                                                               |
|                       | Dr. D. Erzen    |                                                                                                |
|                       | Dr. B. Stabuc   |                                                                                                |
| Hormone<br>Receptors: | Dr. S. Sebek    | Biochemical Laboratory                                                                         |
| Pathologists:         | Dr. R. Golouh   | Pathology Department                                                                           |
|                       | Dr. J. Lamovec  |                                                                                                |
|                       | Dr. J. Jancar   |                                                                                                |
|                       | Dr. M. Sencar   |                                                                                                |
|                       |                 | Institute of Oncology<br>Vrazov trg 4<br>61000 LJUBLJANA, Yugoslavia<br>Tel: (003861) 32 30 63 |

---

MADRID

|                       |                       |                                                                                                                                                |
|-----------------------|-----------------------|------------------------------------------------------------------------------------------------------------------------------------------------|
| Oncologists:          | Dr. H. Cortés-Funes   | Ciudad Sanitaria "1o de Octubre"<br>Carretera de Andalucía, Km. 5,4<br>MADRID 26, Spain<br>Tel: (00341) 269 56 90<br>Telex: ELFA-E (052) 47547 |
| Pathologist:          | Dr. F. Martínez-Tello |                                                                                                                                                |
| Data Manager:         | Dra. S. Cruchaga      |                                                                                                                                                |
| Hormone<br>Receptors: | Dra. L. Larodera      |                                                                                                                                                |
|                       |                       | Clinica Puerta de Hierro<br>San Martín de Porres 4<br>MADRID 35, Spain                                                                         |

---



ADELAIDE

Oncologist: Dr. C.L.M. Olweny  
Dr. E. Abdi  
Dr. A. Robertson  
Royal Adelaide Hospital  
North Terrace  
ADELAIDE. S.A. 5000  
(224-5577)  
Fax: (00618) 2234761  
Telex: AA39764

Surgeons: Mr. P.G. Gill  
Mr. M.L. Carter  
Mr. P. Malycha

Radiotherap.: Dr. E. Yeoh  
Dr. G. Ward

Pathologist: Dr. A.S.-Y Leong  
DR. J. Lommax-Smith  
I.M.V.S.  
Frome Road  
ADELAIDE, S.A. 5000

Hormone  
receptors: Dr. Hoosfall  
F.M.C.

Data manager: Ms. Rhonda d'Angelo  
R.A.H.

---

MELBOURNE

Oncologists: Dr. J. Collins  
Dr. R. Snyder  
Dr. I. Russell  
Dr. J. Bishop  
Dr. S. Hart  
Dr. P. Jeal  
Dr. P. Kitchen  
Dr. R. McLennan  
Dr. M. Schwarz  
Dr. I. Burns  
Dr. M. Green  
Anti-Cancer Council of Victoria  
1 Rathdowne Street  
Carlton South, Victoria 3053  
Australia  
Tel: (00613) 662 3300  
Telex: VCCG (071) 34 158  
Fax: (00613) 663 3412

Hormone  
Receptors: Prof. R.C. Bennett  
Dr. J.W. Funder

Pathologists: Dr. R. Reed

Data  
Managers: Mrs. Brigitte Karazija (chief data manager)  
Mr. David Heath  
Mrs. Debbie Ryan  
Mrs. Suzanne Elmer (Royal Melbourne Hospital)  
Mrs. Roslyn Lea (St. Vincents's Hospital)

---

NEWCASTLE

Principle  
Investigator: Prof. John F. Forbes  
Hunter Oncology Centre  
University of Newcastle  
Newcastle Mater Misericordiae  
Hospital  
WARATAH, N.S.W. 2298  
Australia  
Tel: (0061) 49 679819  
Fax: (0061) 49 601539

Oncologists: Dr. John Stewart  
Dr. John Grygiel  
Dr. Stephen Ackland  
Dr. Jim Denham  
Dr. David Joseph  
Dr. Chris Hamilton  
Dr. Hamish Foster

NEWCASTLE (continued)

Surgeons: Dr. S.W. Darbar  
Dr. J.F. Harrison  
Dr. E.J. Hennesy  
Dr. J.C. Holley  
Dr. D.W. Jackson  
Dr. T.A. Kelly  
Dr. N. Mack Niles  
Dr. P.W. Robinson  
Dr. A.N. Santhanam  
Dr. W.F. Ward

Dr. I. McDonald  
Dr. B. Wardle  
Dr. M. Alexander  
Dr. B. Messmer  
Dr. C.J. Horvath  
Dr. R. Bissett  
Dr. P. Anseline  
Dr. R. Sillar  
Dr. J. Smyth  
Dr. D.G. Walker  
Dr. M. Agrez

Pathologist: Dr. J.M. Bishop  
Hormone  
Receptors: Brett Simms/  
Dr. Jan Bishop

Hunter Oncology Centre

Hunter Oncology Centre

Data Managers: Vicki Ziogas  
Kim Jackson

ANZ Breast Cancer Trials Group  
Operations Office  
Hunter Oncology Centre

---

PERTH

Oncologists: Dr. M. Byrne  
Data Manager: Ms. M. Chesson  
Pathologist: Dr. K.B. Shilkin

Dept. of Medical Oncology

Dept. of Histopathology

Sir Charles Gairdner Hospital  
Queen Elizabeth II Med. Centre  
NEDLANDS, Western Australia 6009  
Tel: (00613) 380 1122  
Ext. 2648/2649/2948  
Telex: QESCG AA (071) 93446  
Fax: (00619) 3893759

Hormone  
Receptors: Prof. R. Hähnel

King Edward Memorial Hospital  
for Women  
374 Bagot Road  
SUBIACO, W. Australia 6008  
Tel: (00613) 381 3300

---

SYDNEY

Oncologists: Prof. M.H.N. Tattersall LICR  
Assoc. Prof. A. Coates Dept. of Medical Oncology  
Sydney Cancer Therapy Unit  
University of Sydney  
2006 SYDNEY, NSW Australia

Hormone Receptors: Dr. T. Foo

Data Manager: Ms. R. Devine  
Tel: (00612) 660 73 62  
Telex: LICS (071) 25 984  
Fax: (00612) 692 43 17

Pathologist: Prof. A. Ng  
Royal Prince Albert Hospital  
Histopathology Department  
Missden Road  
CAMPERDOWN, NSW Australia 2050

---

SWITZERLAND

BASEL

Oncologists: Prof. J.P. Obrecht  
PD Dr. R. Obrist  
Onkologische Poliklinik/DIM  
Kantonsspital  
Petersgraben 4  
4031 BASEL, Switzerland  
Tel: (061) 25 25 25  
Telex: ch-Kbsu-964438  
Fax: (061) 25 74 05

Prof. F. Harder  
Dr. U. Laffer  
Dept. für Chirurgie  
Kantonsspital  
Petersgraben 4  
4031 BASEL, Switzerland

Prof. A.C. Almendral  
Dr. H. Stamm  
Gynäkologische Klinik  
Frauenspital  
Schanzenstrasse 46  
4031 BASEL, Switzerland

Hormone Receptors: PD Dr. U. Eppenberger

Data Manager: Mrs. S. Loosli  
Onkologische Poliklinik  
Kantonsspital  
Petersgraben 4  
4031 BASEL, Switzerland  
Tel: (061) 25 25 25  
Ext. 2305/5016

Pathologist: Prof. J. Torhorst  
Institut für Pathologie  
Universität Basel  
Schönbeinstrasse 40  
4003 BASEL, Switzerland  
Tel: (061) 25 25 25 Ext. 3947

---

BERN

Oncologists: Prof. K.W. Brunner  
Dr. M. Castiglione  
Dr. K. Buser  
Institut für Med. Onkologie  
Inselspital  
3010 BERN, Switzerland  
Tel: (031) 64 24 38

BERN (continued)

Data Manager: Mrs. M. Nandedkar

Surgeons: Prof. E. Dreher  
Prof. Schneider

Kant. Frauenspital  
Schanzeneckstrasse 1  
3012 BERN, Switzerland  
Tel: (031) 23 03 33

Surgeon: Prof. H. Bürgi

Bürgerspital  
4500 SOLOTHURN, Switzerland

Pathologists: Prof. K. Bürki  
Dr. R. Markwalder

Pathologisches Institut der  
Universität Bern  
Freiburgstrasse 30  
3010 BERN, Switzerland  
Tel: (031) 64 21 11 / 64 32 11

Dr. G. Locher

Kant. Frauenspital  
Schanzeneckstrasse 1  
3012 BERN, Switzerland  
Tel: (031) 23 03 33

---

GENEVA

Oncologists: PD Dr. P. Alberto  
Dr. M. Aapro

Centre d'Onco-Hématologie

Surgeons: Prof. F. Krauer  
Dr. P. Schäfer

Service de Gynécologie

Hôpital Cantonal Universitaire  
1205 GENEVA, Switzerland  
Tel: (022) 22 61 11  
Fax: (022) 22 66 79

Dr. D. Obradovic  
(Maternité)

Centre de Cytologie et de  
Dépistage du Cancer  
Boulevard de la Cluse 51  
1205 GENEVA, Switzerland  
Tel: (02) 22 86 43 / 22 86 11

Data Manager: Ms. F. Misset

Clinique de Gynécologie  
Maternité  
Hôpital Cantonal Universitaire  
1205 GENEVA, Switzerland  
Tel: (022) 22 80 85

---

LAUSANNE

Oncologist: Dr. S. Leyvraz

Policlinique Médicale

Pathologist: Dr. P. Anani

Institut de Pathologie

Hormone  
Receptors: Dr. F. Gomez

Division de Biochimie Clinique

Data Manager: Mme. P. Reymond

C H U V  
1011 LAUSANNE, Switzerland  
Tel: (021) 41 11 11

---

NEUCHATEL

Oncologists: Dr. P. Siegenthaler  
Dr. V. Barrelet  
Dr. D. Piguet  
Hôpital des Cadolles  
Service d'Oncologie  
2000 NEUCHATEL, Switzerland  
Tel: (038) 25 22 33/22 91 11

Data Manager: Mrs. V. Pfaff  
Tel: (038) 22 92 55

Pathologist: Dr. R.P. Baumann  
Institut Neuchâtelois d'Anatomie  
Pathologique  
2000 NEUCHATEL, Switzerland

---

ST.GALLEN

Oncologists: Prof. H.J. Senn  
Dr. W.F. Jungi  
Dr. L. Schmid  
Medizinische Klinik C  
Kantonsspital  
9007 ST. GALLEN, Switzerland

Data Manager: Ms. G. Hutter  
Ms. E. Vogel  
Tel: (071) 26 11 11 Ext: 1094  
Fax: (071) 25 68 05  
Telex: KSSG-CH-719 219

Surgeons: Prof. W.W. Rittmann  
Klinik f. Chirurgie  
Tel: (071) 26 11 11 Ext: 1312

Prof. U. Haller  
Klinik f. Geburtshilfe und  
Gynäkologie  
Tel: (071) 26 11 11 Ext: 1862

Pathologist: Dr. M. Stanisic  
Pathologisches Institut  
Rorschacherstrasse 95  
9007 ST. GALLEN, Switzerland  
Tel: (071) 26 11 11 Ext: 2103

Hormone  
Receptors: Prof. H. Keller  
Institut für klinische  
Chemie u. Hämatologie  
Kantonsspital  
9007 ST. GALLEN, Switzerland  
Tel: (071) 26 11 11 Ext: 2602

---

TESSIN

Oncologist: Prof. F. Cavalli  
Dr. C. Sessa  
Dr. G. Martinelli  
Servizio Oncologico  
Ospedale San Giovanni  
6500 BELLINZONA, Switzerland  
Tel: (004192) 250333

PD Dr. A. Goldhirsch  
Dr. A. Neuenschwander  
Ospedale Civico  
Servizio Oncologico  
6900 LUGANO, Switzerland  
Tel: (004191) 586111

Dr. K. Beretta  
Ospedale "la Carità"  
6600 LOCARNO, Switzerland

Surgeon: PD DR. W. Müller  
PD Dr. S. Martinoli  
Chirurgia  
Ospedale Civico  
6900 LUGANO, Switzerland

TESSIN (continued)

Data Manager: Mrs. M. Ginier

Servizio Oncologico  
Ospedale San Giovanni  
6500 BELLINZONA, Switzerland  
Tel: (092) 25 03 33

Pathologist: Dr. E.S. Passega  
Hormone  
Receptors: Prof. G. Losa

Istituto Cantonale di Patologia  
Via in Selva  
6600 LOCARNO, Switzerland

---

ZUERICH

Oncologists: vacant

Prof. V. Engeler

Klinik und Poliklinik für  
Gynäkologie  
Dept. für Frauenheilkunde  
Frauenklinikstrasse 10  
8091 ZÜRICH, Switzerland  
Tel: (01) 252 65 85

PD Dr. R. Joss

Kantonsspital  
Spitalstrasse  
6004 LUZERN, Switzerland  
Tel: (041) 25 11 25

Pathologist: PD Dr. R. Maurer

Institut für Pathologie  
Universität Zürich  
Schmelzbergstrasse 12  
8091 ZÜRICH, Switzerland

Data Manager: Ms. R. Rauch

Onkologische Abteilung  
Dept. für Innere Medizin  
Universitätsspital  
Rämistrasse 100  
8091 ZÜRICH, Switzerland

Tel: (01) 255 22 14

---

ADDITIONAL CORRESPONDENTS

Surgeon: PD Dr. P. Faber

Frauenklinik  
Prosper-Hospital  
Mühlenstrasse 27  
4350 RECKLINGSHAUSEN, BRD  
Tel: 02361/54-2450

---

STATISTICAL CENTER

Statisticians: Prof. R. D. Gelber  
Prof. M. Zelen

Dana-Farber Cancer Institute  
Division of Biostatistics  
and Epidemiology  
44 Binney Street  
BOSTON, Massachusetts 02115

(Prof. Gelber)

Tel: (001) 617 732 3601  
Fax: (001) 617 735 8614

STATISTICAL CENTER (continued)

Data Manager: Mrs. Mary Isley

Frontier Science & Technology  
Research Foundation  
4033 Maple Road  
AMHERST, N.Y. 14226 U.S.A.  
Tel: (001) 716 834 0900  
Fax: (001) 716 834 8675

=====  
COORDINATING CENTER

Study  
Coordinator: Dr. M. Castiglione

Data Manager: Mrs. T. Diabaté

Operations Office  
Seidenweg 63  
3012 BERN, Switzerland

RANDOMIZATION:

TELEPHONE: (31) 24 41 01  
TELEX: SAKK CH 912 539  
FAX: (31) 24 41 03

=====  
QUALITY OF LIFE OFFICE

Psycho-  
Oncologist: Dr. C. Hürny

Medizinische Abteilung Lory  
Tel: (031) 64 20 33

Psychologist/  
Coordinator: Mr. J. Bernhard  
Lic. phil.

Institut für med. Onkologie  
Tel: (031) 64 93 67

Inselspital  
3010 BERN, Switzerland

=====  
EXECUTIVE COMMITTEE

Members: Prof. F. Cavalli

Servizio Oncologico  
Ospedale San Giovanni  
6500 BELLINZONA, Switzerland

Dr. M. Castiglione

Institut für Med. Onkologie  
Inselspital  
3010 BERN, Switzerland

Prof. R.D. Gelber

Dana-Farber Cancer Institute  
Division of Biostatistics  
and Epidemiology  
44 Binney Street  
BOSTON, Massachusetts 02115, USA

Dr. C.-M. Rudenstamm

Sahlgrenska sjukhuset  
Kirurgiska Kliniken I  
413 45 GÖTEBORG, Sweden

Dr. John Collins

Anti-Cancer Council of Victoria  
1 Rathdowne Street  
Carlton South  
3053 VICTORIA, Australia

EXECUTIVE COMMITTEE (continued)

Dr. J. Lindtner  
Dept. of Surgery  
Institute of Oncology  
Vrazov trg 4  
61000 LJUBLJANA, Yugoslavia

Dr. J. Säve-Söderbergh  
Dept. of Pathology  
Ostra Hospital  
Sahlgrens's Hospital  
413 45 GÖTEBORG, Sweden

Prof. H.J. Senn  
Abteilung für  
Onkologie/Hämatologie  
Medizinische Klinik C  
Kantonsspital  
9007 ST. GALLEN, Switzerland

Dr. A. Goldhirsch  
Ospedale Civico  
Servizio Oncologico  
6900 LUGANO, Switzerland

=====

PATHOLOGY CENTER (CENTRAL REVIEW)

Pathologist: Prof. B.A. Gusterson  
Dr. R. Bettelheim  
The Institute of Cancer Research  
Royal Cancer Hospital  
The Haddow Laboratories  
Cliffon Avenue, Sutton  
Surrey SM2 5PX  
England

Special  
consultant: Prof. A.M. Neville  
Ludwig Institute for Cancer  
Research  
Stadelhoferstrasse 22  
8001 ZÜRICH, Switzerland

\* \* \*



APPENDIX V

Tables for Determination of Surface Area (m<sup>2</sup>) as a Function of Height (cm) and Weight (kg) \*

| Height (cm) | Weight (kg) |      |      |      |      |      |      |      |      |      |      |      |        |      |      |      |      |      |      |      |      |      |      |      |
|-------------|-------------|------|------|------|------|------|------|------|------|------|------|------|--------|------|------|------|------|------|------|------|------|------|------|------|
|             | 4           | 6    | 8    | 10   | 12   | 14   | 16   | 18   | 20   | 22   | 24   | 26   | 28     | 30   | 32   | 34   | 36   | 38   | 40   | 44   | 48   | 52   | 56   | 60   |
| 50          | 0.25        | 0.31 | 0.36 | 0.40 | 0.44 | 0.48 | 0.51 | 0.54 | 0.57 | 0.60 | 0.63 | 0.66 | 0.68   | 0.71 | 0.73 | 0.75 | 0.78 | 0.80 | 0.82 | 0.86 | 0.90 | 0.94 | 0.97 | 1.01 |
| 55          | 0.26        | 0.32 | 0.37 | 0.42 | 0.46 | 0.50 | 0.53 | 0.57 | 0.60 | 0.63 | 0.66 | 0.68 | 0.71   | 0.74 | 0.76 | 0.78 | 0.81 | 0.83 | 0.85 | 0.90 | 0.94 | 0.98 | 1.01 | 1.05 |
| 60          | 0.27        | 0.33 | 0.39 | 0.43 | 0.48 | 0.52 | 0.55 | 0.59 | 0.62 | 0.65 | 0.68 | 0.71 | 0.74   | 0.76 | 0.79 | 0.81 | 0.84 | 0.86 | 0.88 | 0.93 | 0.97 | 1.01 | 1.05 | 1.09 |
| 65          | 0.28        | 0.34 | 0.40 | 0.45 | 0.49 | 0.53 | 0.57 | 0.61 | 0.64 | 0.67 | 0.70 | 0.73 | 0.76   | 0.79 | 0.82 | 0.84 | 0.87 | 0.89 | 0.91 | 0.96 | 1.00 | 1.04 | 1.08 | 1.13 |
| 70          | 0.29        | 0.36 | 0.41 | 0.46 | 0.51 | 0.55 | 0.59 | 0.63 | 0.66 | 0.69 | 0.73 | 0.76 | 0.79   | 0.81 | 0.84 | 0.87 | 0.89 | 0.92 | 0.94 | 0.99 | 1.04 | 1.08 | 1.12 | 1.16 |
| 75          | 0.30        | 0.37 | 0.42 | 0.48 | 0.52 | 0.57 | 0.61 | 0.64 | 0.68 | 0.71 | 0.75 | 0.78 | 0.81   | 0.84 | 0.87 | 0.89 | 0.92 | 0.95 | 0.97 | 1.02 | 1.07 | 1.11 | 1.16 | 1.20 |
| 80          | 0.31        | 0.38 | 0.44 | 0.49 | 0.54 | 0.58 | 0.62 | 0.66 | 0.70 | 0.73 | 0.77 | 0.80 | 0.83   | 0.86 | 0.89 | 0.92 | 0.95 | 0.97 | 1.02 | 1.06 | 1.10 | 1.14 | 1.19 | 1.23 |
| 85          | 0.31        | 0.39 | 0.45 | 0.50 | 0.55 | 0.60 | 0.64 | 0.68 | 0.72 | 0.75 | 0.79 | 0.82 | 0.85   | 0.88 | 0.91 | 0.94 | 0.97 | 1.00 | 1.02 | 1.06 | 1.10 | 1.15 | 1.20 | 1.25 |
| 90          | 0.32        | 0.40 | 0.46 | 0.51 | 0.56 | 0.61 | 0.65 | 0.70 | 0.73 | 0.77 | 0.81 | 0.84 | 0.87   | 0.91 | 0.94 | 0.97 | 0.99 | 1.02 | 1.05 | 1.10 | 1.15 | 1.20 | 1.25 | 1.29 |
| 95          | 0.33        | 0.40 | 0.47 | 0.53 | 0.58 | 0.63 | 0.67 | 0.71 | 0.75 | 0.79 | 0.83 | 0.86 | 0.89   | 0.93 | 0.96 | 0.99 | 1.02 | 1.05 | 1.07 | 1.13 | 1.18 | 1.23 | 1.28 | 1.32 |
| 100         | 0.34        | 0.41 | 0.48 | 0.54 | 0.60 | 0.65 | 0.69 | 0.73 | 0.77 | 0.81 | 0.85 | 0.88 | 0.91   | 0.95 | 0.98 | 1.01 | 1.04 | 1.07 | 1.10 | 1.15 | 1.20 | 1.25 | 1.30 | 1.35 |
| 105         | 0.35        | 0.42 | 0.49 | 0.55 | 0.61 | 0.67 | 0.71 | 0.75 | 0.79 | 0.83 | 0.87 | 0.90 | 0.93   | 0.97 | 1.00 | 1.03 | 1.06 | 1.09 | 1.12 | 1.17 | 1.22 | 1.27 | 1.32 | 1.37 |
| 110         | 0.36        | 0.43 | 0.50 | 0.56 | 0.62 | 0.68 | 0.72 | 0.76 | 0.80 | 0.84 | 0.88 | 0.91 | 0.94   | 0.98 | 1.01 | 1.04 | 1.07 | 1.10 | 1.13 | 1.18 | 1.23 | 1.28 | 1.33 | 1.38 |
| 115         | 0.37        | 0.44 | 0.51 | 0.57 | 0.63 | 0.69 | 0.73 | 0.77 | 0.81 | 0.85 | 0.89 | 0.92 | 0.95   | 0.99 | 1.02 | 1.05 | 1.08 | 1.11 | 1.14 | 1.19 | 1.24 | 1.29 | 1.34 | 1.39 |
| 120         | 0.38        | 0.45 | 0.52 | 0.58 | 0.64 | 0.70 | 0.74 | 0.78 | 0.82 | 0.86 | 0.90 | 0.93 | 0.96   | 1.00 | 1.03 | 1.06 | 1.09 | 1.12 | 1.15 | 1.20 | 1.25 | 1.30 | 1.35 | 1.40 |
| 125         | 0.39        | 0.46 | 0.53 | 0.59 | 0.65 | 0.71 | 0.75 | 0.79 | 0.83 | 0.87 | 0.91 | 0.94 | 0.97   | 1.01 | 1.04 | 1.07 | 1.10 | 1.13 | 1.16 | 1.21 | 1.26 | 1.31 | 1.36 | 1.41 |
| 130         | 0.40        | 0.47 | 0.54 | 0.60 | 0.66 | 0.72 | 0.76 | 0.80 | 0.84 | 0.88 | 0.92 | 0.95 | 0.98   | 1.02 | 1.05 | 1.08 | 1.11 | 1.14 | 1.17 | 1.22 | 1.27 | 1.32 | 1.37 | 1.42 |
| 135         | 0.41        | 0.48 | 0.55 | 0.61 | 0.67 | 0.73 | 0.77 | 0.81 | 0.85 | 0.89 | 0.93 | 0.96 | 0.99   | 1.03 | 1.06 | 1.09 | 1.12 | 1.15 | 1.18 | 1.23 | 1.28 | 1.33 | 1.38 | 1.43 |
| 140         | 0.42        | 0.49 | 0.56 | 0.62 | 0.68 | 0.74 | 0.78 | 0.82 | 0.86 | 0.90 | 0.94 | 0.97 | 1.01   | 1.04 | 1.07 | 1.10 | 1.13 | 1.16 | 1.19 | 1.24 | 1.29 | 1.34 | 1.39 | 1.44 |
| 145         | 0.43        | 0.50 | 0.57 | 0.63 | 0.69 | 0.75 | 0.79 | 0.83 | 0.87 | 0.91 | 0.95 | 0.98 | 1.02   | 1.05 | 1.08 | 1.11 | 1.14 | 1.17 | 1.20 | 1.25 | 1.30 | 1.35 | 1.40 | 1.45 |
| 150         | 0.44        | 0.51 | 0.58 | 0.64 | 0.70 | 0.76 | 0.80 | 0.84 | 0.88 | 0.92 | 0.96 | 0.99 | 1.03   | 1.06 | 1.09 | 1.12 | 1.15 | 1.18 | 1.21 | 1.26 | 1.31 | 1.36 | 1.41 | 1.46 |
| 155         | 0.45        | 0.52 | 0.59 | 0.65 | 0.71 | 0.77 | 0.81 | 0.85 | 0.89 | 0.93 | 0.97 | 1.00 | 1.04   | 1.07 | 1.10 | 1.13 | 1.16 | 1.19 | 1.22 | 1.27 | 1.32 | 1.37 | 1.42 | 1.47 |
| 160         | 0.46        | 0.53 | 0.60 | 0.66 | 0.72 | 0.78 | 0.82 | 0.86 | 0.90 | 0.94 | 0.98 | 1.01 | 1.05   | 1.08 | 1.11 | 1.14 | 1.17 | 1.20 | 1.23 | 1.28 | 1.33 | 1.38 | 1.43 | 1.48 |
| 165         | 0.47        | 0.54 | 0.61 | 0.67 | 0.73 | 0.79 | 0.83 | 0.87 | 0.91 | 0.95 | 0.99 | 1.02 | 1.06   | 1.09 | 1.12 | 1.15 | 1.18 | 1.21 | 1.24 | 1.29 | 1.34 | 1.39 | 1.44 | 1.49 |
| 170         | 0.48        | 0.55 | 0.62 | 0.68 | 0.74 | 0.80 | 0.84 | 0.88 | 0.92 | 0.96 | 1.00 | 1.03 | 1.07   | 1.10 | 1.13 | 1.16 | 1.19 | 1.22 | 1.25 | 1.30 | 1.35 | 1.40 | 1.45 | 1.50 |
| 175         | 0.49        | 0.56 | 0.63 | 0.69 | 0.75 | 0.81 | 0.85 | 0.89 | 0.93 | 0.97 | 1.01 | 1.04 | 1.08   | 1.11 | 1.14 | 1.17 | 1.20 | 1.23 | 1.26 | 1.31 | 1.36 | 1.41 | 1.46 | 1.51 |
| 180         | 0.50        | 0.57 | 0.64 | 0.70 | 0.76 | 0.82 | 0.86 | 0.90 | 0.94 | 0.98 | 1.02 | 1.05 | 1.09   | 1.12 | 1.15 | 1.18 | 1.21 | 1.24 | 1.27 | 1.32 | 1.37 | 1.42 | 1.47 | 1.52 |
| 185         | 0.51        | 0.58 | 0.65 | 0.71 | 0.77 | 0.83 | 0.87 | 0.91 | 0.95 | 0.99 | 1.03 | 1.06 | 1.10   | 1.13 | 1.16 | 1.19 | 1.22 | 1.25 | 1.28 | 1.33 | 1.38 | 1.43 | 1.48 | 1.53 |
| 190         | 0.52        | 0.59 | 0.66 | 0.72 | 0.78 | 0.84 | 0.88 | 0.92 | 0.96 | 1.00 | 1.04 | 1.07 | 1.11   | 1.14 | 1.17 | 1.20 | 1.23 | 1.26 | 1.29 | 1.34 | 1.39 | 1.44 | 1.49 | 1.54 |
| 195         | 0.53        | 0.60 | 0.67 | 0.73 | 0.79 | 0.85 | 0.89 | 0.93 | 0.97 | 1.01 | 1.05 | 1.08 | 1.12   | 1.15 | 1.18 | 1.21 | 1.24 | 1.27 | 1.30 | 1.35 | 1.40 | 1.45 | 1.50 | 1.55 |
| 200         | 0.54        | 0.61 | 0.68 | 0.74 | 0.80 | 0.86 | 0.90 | 0.94 | 0.98 | 1.02 | 1.06 | 1.09 | 1.13   | 1.16 | 1.19 | 1.22 | 1.25 | 1.28 | 1.31 | 1.36 | 1.41 | 1.46 | 1.51 | 1.56 |
| 205         | 0.55        | 0.62 | 0.69 | 0.75 | 0.81 | 0.87 | 0.91 | 0.95 | 0.99 | 1.03 | 1.07 | 1.10 | 1.14   | 1.17 | 1.20 | 1.23 | 1.26 | 1.29 | 1.32 | 1.37 | 1.42 | 1.47 | 1.52 | 1.57 |
| 210         | 0.56        | 0.63 | 0.70 | 0.76 | 0.82 | 0.88 | 0.92 | 0.96 | 1.00 | 1.04 | 1.08 | 1.11 | 1.15   | 1.18 | 1.21 | 1.24 | 1.27 | 1.30 | 1.33 | 1.38 | 1.43 | 1.48 | 1.53 | 1.58 |
| 215         | 0.57        | 0.64 | 0.71 | 0.77 | 0.83 | 0.89 | 0.93 | 0.97 | 1.01 | 1.05 | 1.09 | 1.12 | 1.16   | 1.19 | 1.22 | 1.25 | 1.28 | 1.31 | 1.34 | 1.39 | 1.44 | 1.49 | 1.54 | 1.59 |
| 220         | 0.58        | 0.65 | 0.72 | 0.78 | 0.84 | 0.90 | 0.94 | 0.98 | 1.02 | 1.06 | 1.10 | 1.13 | 1.17   | 1.20 | 1.23 | 1.26 | 1.29 | 1.32 | 1.35 | 1.40 | 1.45 | 1.50 | 1.55 | 1.60 |
| 225         | 0.59        | 0.66 | 0.73 | 0.79 | 0.85 | 0.91 | 0.95 | 0.99 | 1.03 | 1.07 | 1.11 | 1.14 | 1.18   | 1.21 | 1.24 | 1.27 | 1.30 | 1.33 | 1.36 | 1.41 | 1.46 | 1.51 | 1.56 | 1.61 |
| 230         | 0.60        | 0.67 | 0.74 | 0.80 | 0.86 | 0.92 | 0.96 | 1.00 | 1.04 | 1.08 | 1.12 | 1.15 | 1.19   | 1.22 | 1.25 | 1.28 | 1.31 | 1.34 | 1.37 | 1.42 | 1.47 | 1.52 | 1.57 | 1.62 |
| 235         | 0.61        | 0.68 | 0.75 | 0.81 | 0.87 | 0.93 | 0.97 | 1.01 | 1.05 | 1.09 | 1.13 | 1.16 | 1.20   | 1.23 | 1.26 | 1.29 | 1.32 | 1.35 | 1.38 | 1.43 | 1.48 | 1.53 | 1.58 | 1.63 |
| 240         | 0.62        | 0.69 | 0.76 | 0.82 | 0.88 | 0.94 | 0.98 | 1.02 | 1.06 | 1.10 | 1.14 | 1.17 | 1.21   | 1.24 | 1.27 | 1.30 | 1.33 | 1.36 | 1.39 | 1.44 | 1.49 | 1.54 | 1.59 | 1.64 |
| 245         | 0.63        | 0.70 | 0.77 | 0.83 | 0.89 | 0.95 | 0.99 | 1.03 | 1.07 | 1.11 | 1.15 | 1.18 | 1.22   | 1.25 | 1.28 | 1.31 | 1.34 | 1.37 | 1.40 | 1.45 | 1.50 | 1.55 | 1.60 | 1.65 |
| 250         | 0.64        | 0.71 | 0.78 | 0.84 | 0.90 | 0.96 | 1.00 | 1.04 | 1.08 | 1.12 | 1.16 | 1.19 | 1.23   | 1.26 | 1.29 | 1.32 | 1.35 | 1.38 | 1.41 | 1.46 | 1.51 | 1.56 | 1.61 | 1.66 |
| 255         | 0.65        | 0.72 | 0.79 | 0.85 | 0.91 | 0.97 | 1.01 | 1.05 | 1.09 | 1.13 | 1.17 | 1.20 | 1.24   | 1.27 | 1.30 | 1.33 | 1.36 | 1.39 | 1.42 | 1.47 | 1.52 | 1.57 | 1.62 | 1.67 |
| 260         | 0.66        | 0.73 | 0.80 | 0.86 | 0.92 | 0.98 | 1.02 | 1.06 | 1.10 | 1.14 | 1.18 | 1.21 | 1.25   | 1.28 | 1.31 | 1.34 | 1.37 | 1.40 | 1.43 | 1.48 | 1.53 | 1.58 | 1.63 | 1.68 |
| 265         | 0.67        | 0.74 | 0.81 | 0.87 | 0.93 | 0.99 | 1.03 | 1.07 | 1.11 | 1.15 | 1.19 | 1.22 | 1.26   | 1.29 | 1.32 | 1.35 | 1.38 | 1.41 | 1.44 | 1.49 | 1.54 | 1.59 | 1.64 | 1.69 |
| 270         | 0.68        | 0.75 | 0.82 | 0.88 | 0.94 | 1.00 | 1.04 | 1.08 | 1.12 | 1.16 | 1.20 | 1.23 | 1.27   | 1.30 | 1.33 | 1.36 | 1.39 | 1.42 | 1.45 | 1.50 | 1.55 | 1.60 | 1.65 | 1.70 |
| 275         | 0.69        | 0.76 | 0.83 | 0.89 | 0.95 | 1.01 | 1.05 | 1.09 | 1.13 | 1.17 | 1.21 | 1.24 | 1.28   | 1.31 | 1.34 | 1.37 | 1.40 | 1.43 | 1.46 | 1.51 | 1.56 | 1.61 | 1.66 | 1.71 |
| 280         | 0.70        | 0.77 | 0.84 | 0.90 | 0.96 | 1.02 | 1.06 | 1.10 | 1.14 | 1.18 | 1.22 | 1.25 | 1.29   | 1.32 | 1.35 | 1.38 | 1.41 | 1.44 | 1.47 | 1.52 | 1.57 | 1.62 | 1.67 | 1.72 |
| 285         | 0.71        | 0.78 | 0.85 | 0.91 | 0.97 | 1.03 | 1.07 | 1.11 | 1.15 | 1.19 | 1.23 | 1.26 | 1.30   | 1.33 | 1.36 | 1.39 | 1.42 | 1.45 | 1.48 | 1.53 | 1.58 | 1.63 | 1.68 | 1.73 |
| 290         | 0.72        | 0.79 | 0.86 | 0.92 | 0.98 | 1.04 | 1.08 | 1.12 | 1.16 | 1.20 | 1.24 | 1.27 | 1.31   | 1.34 | 1.37 | 1.40 | 1.43 | 1.46 | 1.49 | 1.54 | 1.59 | 1.64 | 1.69 | 1.74 |
| 295         | 0.73        | 0.80 | 0.87 | 0.93 | 0.99 | 1.05 | 1.09 | 1.13 | 1.17 | 1.21 | 1.25 | 1.28 | 1.32   | 1.35 | 1.38 | 1.41 | 1.44 | 1.47 | 1.50 | 1.55 | 1.60 | 1.65 | 1.70 | 1.75 |
| 300         | 0.74        | 0.81 | 0.88 | 0.94 | 1.00 | 1.06 | 1.10 | 1.14 | 1.18 | 1.22 | 1.25 | 1.29 | 1.32   | 1.35 | 1.38 | 1.41 | 1.44 | 1.47 | 1.50 | 1.55 | 1.60 | 1.65 | 1.70 | 1.75 |
| 305         | 0.75        | 0.82 | 0.89 | 0.95 | 1.01 | 1.07 | 1.11 | 1.15 | 1.19 | 1.23 | 1.26 | 1.30 | 1.33   | 1.36 | 1.39 | 1.42 | 1.45 | 1.48 | 1.51 | 1.56 | 1.61 | 1.66 | 1.71 | 1.76 |
| 310         | 0.76        | 0.83 | 0.90 | 0.96 | 1.02 | 1.08 | 1.12 | 1.16 | 1.20 | 1.24 | 1.27 | 1.31 | 1.34</ |      |      |      |      |      |      |      |      |      |      |      |

APPENDIX V

TABLE FOR DETERMINING IDEAL SURFACE AREA BY HEIGHT AND AGE CATEGORIES  
(Used for Dose Calculations if Less Than Actual Surface Area)

| CM  | HEIGHT |       | AGE   |       |       |       |       |       |       |
|-----|--------|-------|-------|-------|-------|-------|-------|-------|-------|
|     | Ft.    | Inch. | 25-29 | 30-34 | 35-39 | 40-44 | 45-49 | 50-54 | 55 UP |
| 149 | 4      | 11    | 1.5   | 1.5   | 1.5   | 1.6   | 1.6   | 1.6   | 1.6   |
| 152 | 5      | 0     | 1.5   | 1.6   | 1.6   | 1.6   | 1.6   | 1.6   | 1.6   |
| 155 | 4      | 1     | 1.5   | 1.6   | 1.6   | 1.6   | 1.6   | 1.7   | 1.7   |
| 157 | 5      | 2     | 1.6   | 1.6   | 1.6   | 1.6   | 1.7   | 1.7   | 1.7   |
| 160 | 5      | 3     | 1.6   | 1.6   | 1.7   | 1.7   | 1.7   | 1.7   | 1.7   |
| 162 | 5      | 4     | 1.6   | 1.7   | 1.7   | 1.7   | 1.7   | 1.7   | 1.8   |
| 165 | 5      | 5     | 1.7   | 1.7   | 1.7   | 1.7   | 1.8   | 1.8   | 1.8   |
| 167 | 5      | 6     | 1.7   | 1.7   | 1.8   | 1.8   | 1.8   | 1.8   | 1.8   |
| 170 | 5      | 7     | 1.7   | 1.8   | 1.8   | 1.8   | 1.8   | 1.8   | 1.8   |
| 172 | 5      | 8     | 1.8   | 1.8   | 1.8   | 1.8   | 1.9   | 1.9   | 1.9   |
| 175 | 5      | 9     | 1.8   | 1.8   | 1.9   | 1.9   | 1.9   | 1.9   | 1.9   |
| 177 | 5      | 10    | 1.9   | 1.9   | 1.9   | 1.9   | 1.9   | 2.0   | 2.0   |
| 180 | 5      | 11    | 1.9   | 1.9   | 1.9   | 1.9   | 2.0   | 2.0   | 2.0   |
| 183 | 6      | 0     | 1.9   | 1.9   | 2.0   | 2.0   | 2.0   | 2.0   | 2.0   |

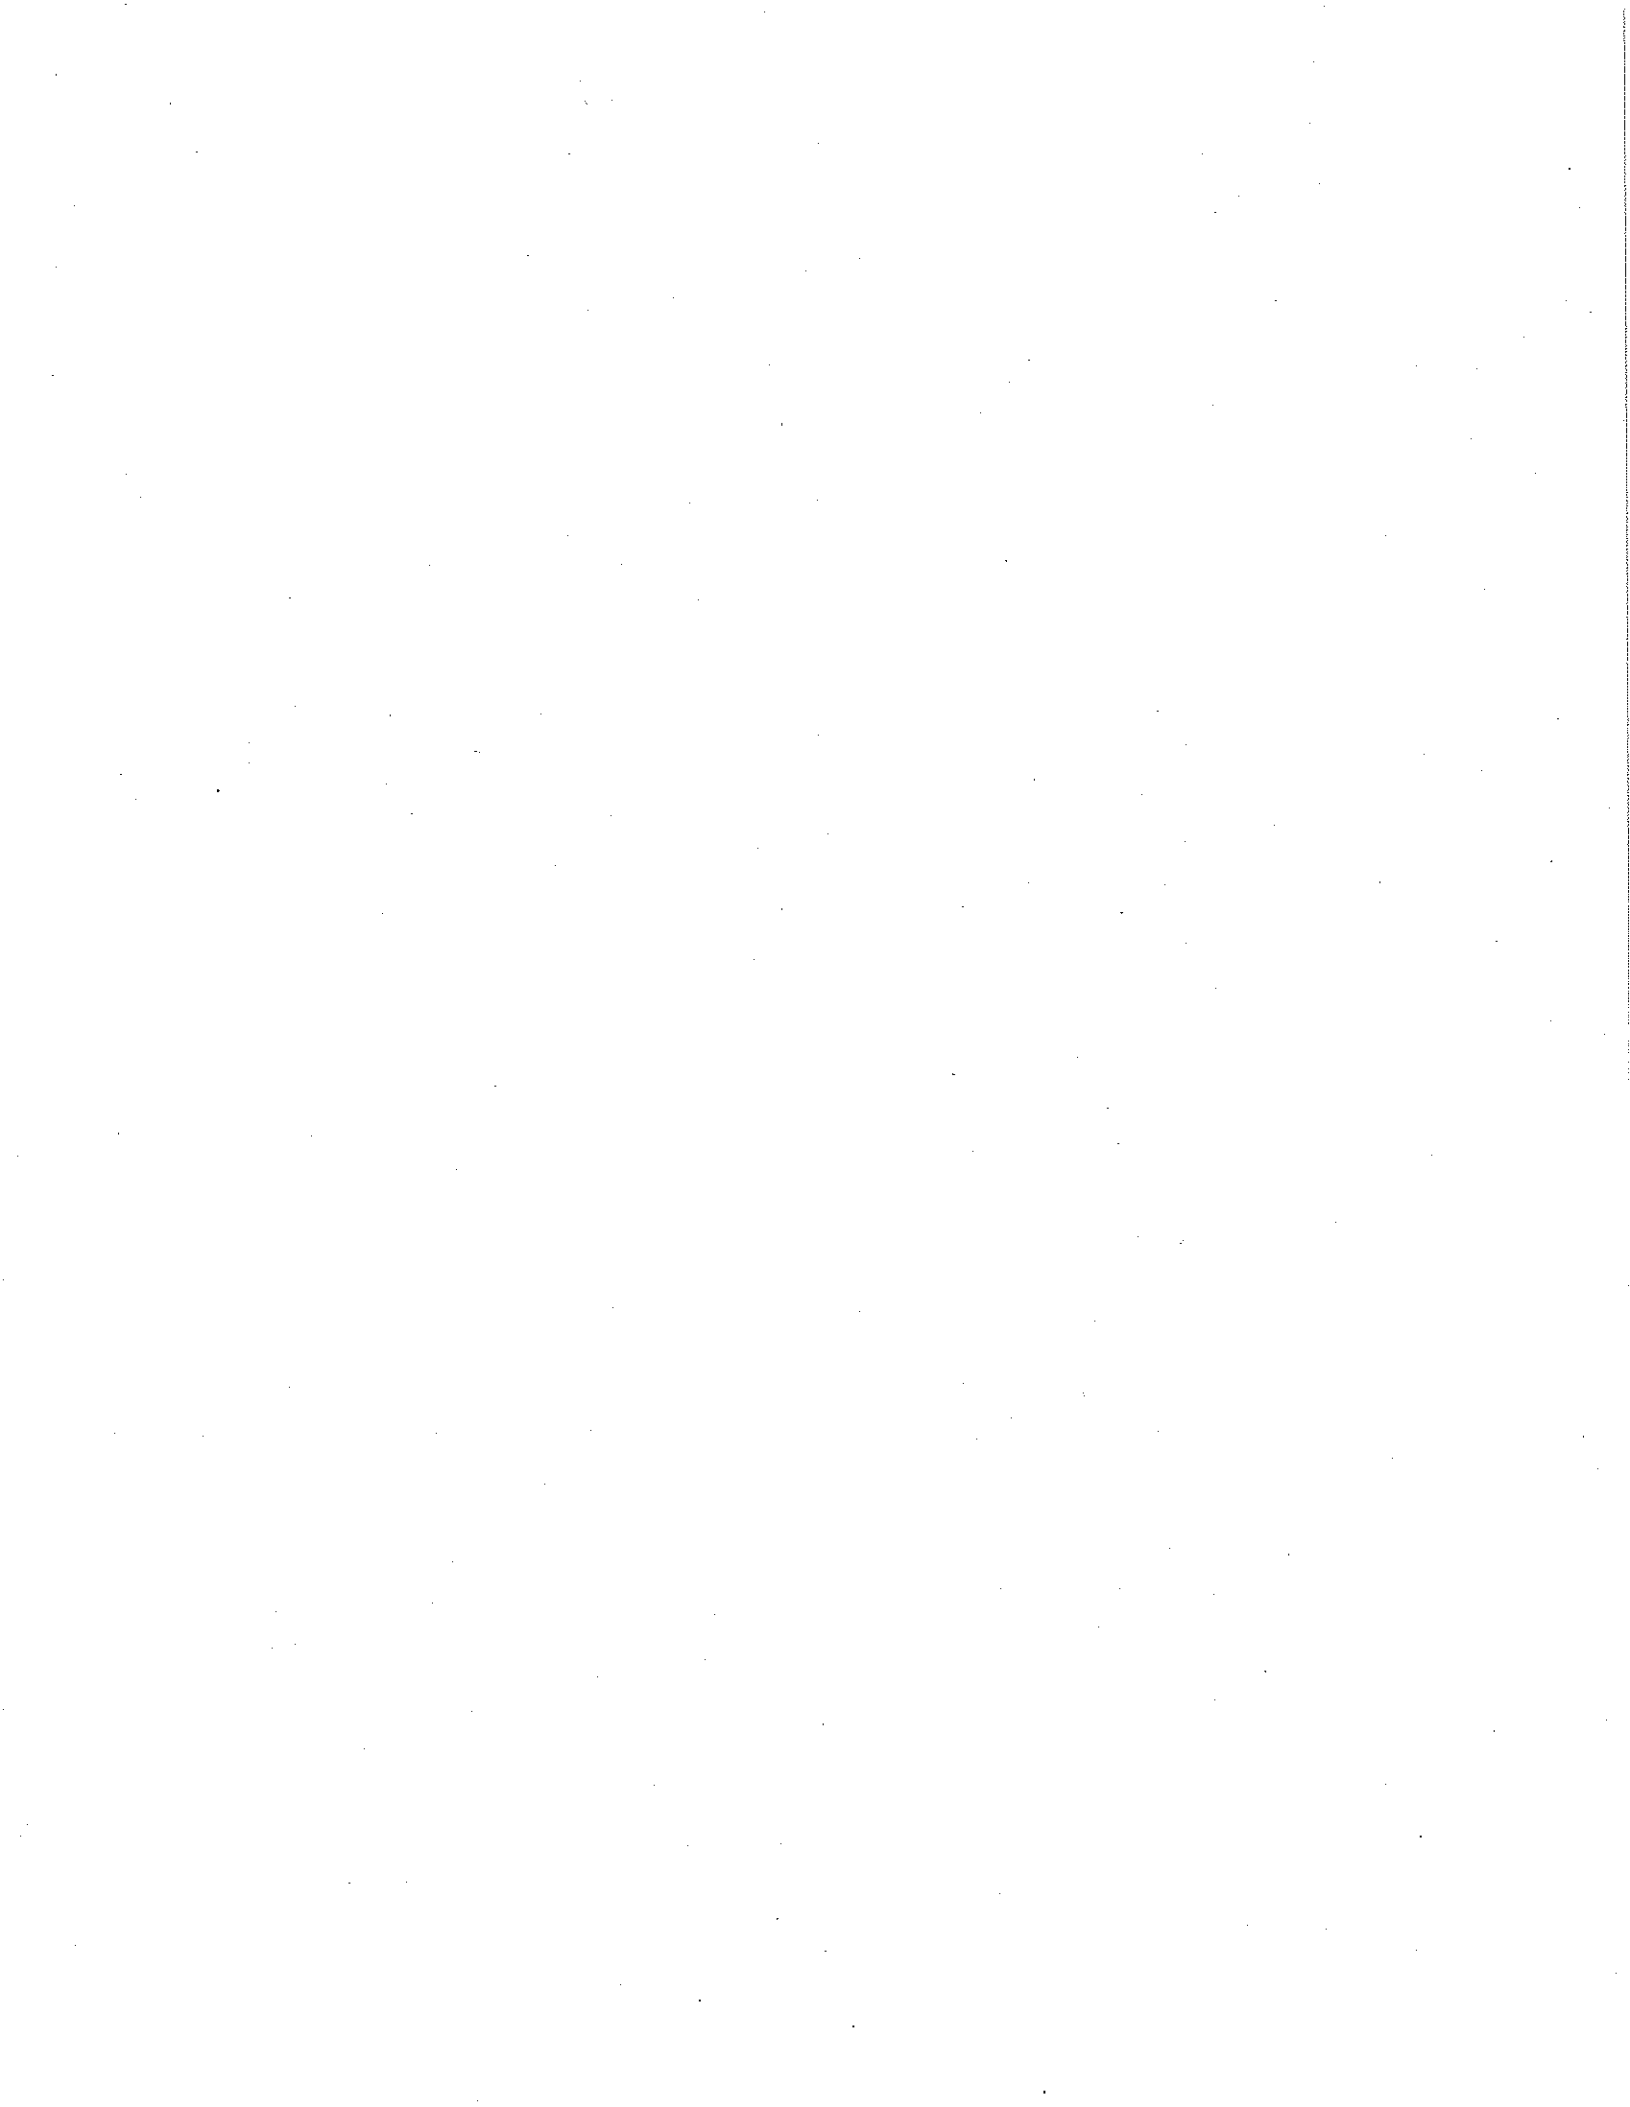

Supplement: supp_JCO.2012.46.1574_Protocol1_JCO.2012.46.1574.pdf [file supp_JCO.2012.46.1574_Protocol1_JCO.2012.46.1574.pdf]
