# Supplementary material
Source: PubMed Central journal article supplement (PMC3753700)
Supplement: supp_JCO.2012.46.1574_Data_Supplement_JCO.2012.46.1574.pdf [file supp_JCO.2012.46.1574_Data_Supplement_JCO.2012.46.1574.pdf]

**Patterns of relapse according to breast cancer subtypes in lymph node-negative disease –  
Results from International Breast Cancer Study Group Trials VIII and IX**

**Metzger-Filho, et al**

## **Supplement to “Patterns of recurrence and outcome according to breast cancer subtypes in lymph node-negative disease – Results from International Breast Cancer Study Group Trials VIII and IX”**

**Metzger-Filho et al**

### **Section 1: Pathology assessment**

Retrospective central pathology evaluation included ER, PgR, HER2 (immunohistochemistry) and Ki-67 labeling index (LI) performed in the IBCSG Central Pathology Laboratory, European Institute of Oncology, Milan, Italy.

Estrogen receptor (ER) and progesterone receptor (PgR) assessment - Whole tumor sections were incubated with the specific primary mouse monoclonal antibodies to ER (clone 1D5; 1:100 dilution) or PgR (clone 1A6; 1:800 dilution) (both from Dako). ER- and PgR-negative status was defined as < 1% immunoreactive cells

Ki-67 Labeling Index (LI) was assessed using mouse monoclonal antibody MIB-1 (1:200 dilution; Dako, Glostrup, Denmark); the percentage of cells that showed definite nuclear immunoreactivity with MIB-1 among 2,000 invasive neoplastic cells in randomly selected high-power fields (x400) at the periphery of the tumor was recorded.

HER2 immunoreactivity was assessed using a HercepTest kit (Dako), and was scored for the intensity of immunostaining, the completeness of cell membrane staining, and the percentage of immunoreactive neoplastic cells by using a four-tier scale from 0 to 3+. HER2-negative status was defined as immunostaining levels 0, 1+ and HER2-positive was defined as intense and complete membrane staining of >10% of the tumor cells (3+).

Fluorescent in situ hybridization (FISH) was performed on the tissue microarrays (TMAs) using a PathVysion kit (Vysis-Abbott) and considered positive when the HER2: C17 ratio > 2.0. Tissue microarrays were built in the Garvan Institute of Medical Research, Sydney, Australia. The TMAs were produced using the MTA-1 Manual Tissue Arrayer and a 1.0 mm needle to biopsy tumor tissue identified by examination of hematoxylin and eosin (H&E)-stained slides from a standard histological block. Three representative cores were taken from each donor block and deposited in the recipient array block. Each array in Trial VIII comprised 108 ( $9 \pm 12$ ) cores representing about 32 patients. Arrays from Trial IX comprised 96 cores ( $8 \pm 12$ ) representing about 28 patients. An asymmetric template was employed for core orientation. Cores of renal tissue ( $\pm 6$ ) were randomly placed within each array to act as orientation markers when scoring. Normal breast cores taken from reduction mammoplasties ( $\pm 6$ ) were also placed on each array to allow comparison between immunohistochemical staining in morphological normal breast and invasive breast carcinoma.

## Section 2: Hormone receptor status within HER2 subtype

**Figure S1:** Kaplan-Meier estimates of breast cancer-free interval (BCFI) by hormone receptor status in the HER2 subtype.

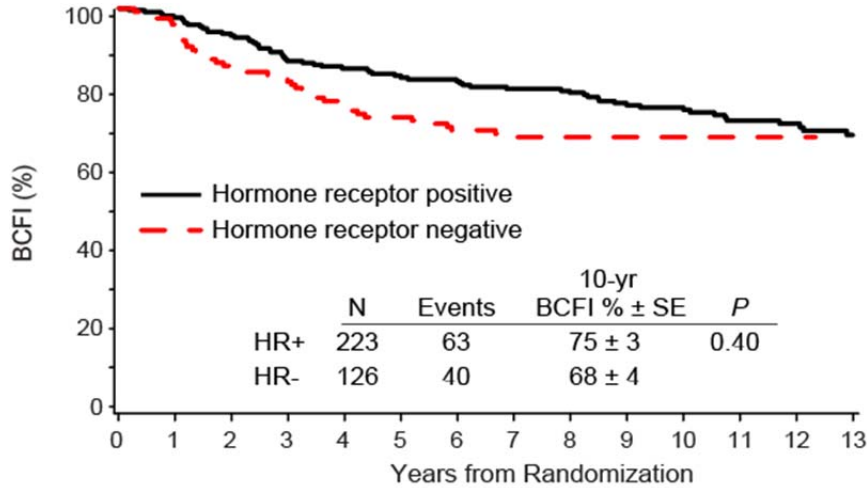

**Table S1:** 10-year cumulative incidence % ± standard error for HER2+ patients by hormone receptor status

| Site of First event  | HER2+ hormone receptor + (n =223) |            | HER2+ hormone receptor - (n =126) |            | Gray test p-value |
|----------------------|-----------------------------------|------------|-----------------------------------|------------|-------------------|
|                      | No.                               | 10-y%±SE*  | No.                               | 10-y%±SE*  |                   |
| Local                | 14                                | 5.56±0.02  | 12                                | 9.63±0.03  | 0.30              |
| Contralateral breast | 7                                 | 3.0±0.01   | 2                                 | 1.6±0.01   | 0.36              |
| Nodal (no CT)        | 2                                 | 2.02±0.01  | 0                                 | 0±0.00     | 0.28              |
| Nodal (CT)           | 2                                 | 0.88±0.01  | 5                                 | 7.41±0.03  | 0.05              |
| Bone                 | 11                                | 3.66±0.01  | 1                                 | 0.8±0.01   | 0.04              |
| Visceral ( no CT)**  | 12                                | 11.35±0.03 | 13                                | 22.66±0.06 | 0.08              |
| Visceral (CT)**      | 15                                | 11.51±0.03 | 7                                 | 10.35±0.04 | 0.30              |

Note: Hormone receptor positive (+) is defined as ER-positive and/or PgR-positive and hormone receptor negative is defined as ER-negative and PgR-negative. A total of 20 HER2-positive patients were not included in the analysis due to missing/unknown values of ER and/or PgR.

### **Section 3: INTERNATIONAL BREAST CANCER STUDY GROUP Participants in Trials VIII and IX**

**Scientific Committee:** A. Goldhirsch, A.S. Coates, M. Colleoni (Co-Chairs)

**Foundation Council:** R. Stahl (President), S. Aebi, A.S. Coates, M. Colleoni, R.D. Gelber, A. Goldhirsch, M. Green, P. Karlsson, I. Kössler, I. Láng

**IBCSG Coordinating Center,** Bern, Switzerland: A. Hiltbrunner (Director), R. Kammler, R. Maibach, M. Rabaglio, B. Ruepp, P. Sicher, S. Roux

**IBCSG Statistical Center,** Dana-Farber Cancer Institute, Boston, MA, USA: R.D. Gelber (Director), M.M. Regan (Group Statistician), K.N. Price, Z. Sun

**IBCSG Data Management Center,** Frontier Science & Technology, Research Foundation, Amherst, NY, USA: L. Blacher (Director), T. Heckman-Scolese, R. Hinkle, J. Celano, S. Lippert

**Pathology Office, European Institute of Oncology, Milan, Italy:** G. Viale, E. Maiorano, M. Mastropasqua, S. Andrighetto, G. Peruzzotti, R. Ghisini, E. Scarano, P. Dell'Orto, B. Del Curto

**Pathology Office, University of Glasgow, Scotland, UK:** B. Gusterson, E. Mallon

**The Ontario Cancer Treatment and Research Foundation, Toronto Sunnybrook Regional Cancer Centre, Toronto, Canada:** K. Pritchard, D. Sutherland, C. Sawka, G. Taylor, R. Choo, C. Catzavelos, K. Roche, H. Wedad

**National Institute of Oncology, Budapest, Hungary:** I. Láng, E. Hitre, E. Juhos, I. Szamel, J. Toth, Z. Orosz, I. Peter

**Centro di Riferimento Oncologico, Aviano, Italy:** D. Crivellari, S. Monfardini, E. Galligioni, M.D. Magri, A. Veronesi, A. Buonadonna, S. Massarut, C. Rossi, E. Candiani, A. Carbone, T. Perin, R. Volpe, M. Roncadin, M. Arcicasa, F. Coran, S. Morassut

**Spedali Civili & Fondazione Beretta, Brescia, Italy:** E. Simoncini, G. Marini, P. Marpicati, M. Braga, P. Grigolato, L. Lucini

**General Hospital, Gorizia, Italy:** S. Foladore, L. Foghin, G. Pamich, C. Bianchi, B. Marino, A. Murgia, V. Milan

**European Institute of Oncology, Milano, Italy:** A. Goldhirsch, M. Colleoni, G. Martinelli, L. Orlando, F. Nolé, A. Luini, R. Orecchia, G. Viale, G. Renne, G. Mazzarol, F. Peccatori, F. de Braud, A. Costa, S. Zurrida, P. Veronesi, V. Sacchini, V. Galimberti, M. Intra, S. Cinieri, G. Peruzzotti, U. Veronesi

**Ospedale Infermi, Rimini, Italy:** A. Ravaioli, D. Tassinari, G. Oliverio, F. Barbanti, P. Rinaldi, L. Gianni, G. Drudi

**Ospedale S. Eugenio, Roma, Italy:** M. Antimi, M. Minelli, V. Bellini, R. Porzio, E. Pernazza, G. Santeusano, L.G. Spagnoli

**Ospedale S. Bortolo, Vicenza, Italy:** M. Magazu, V. Fosser, P. Morandi, G. Scalco, M. Balli, E.S.G. d'Amore, S. Meli, G. Torsello

**The Institute of Oncology, Ljubljana, Slovenia:** J. Lindtner, D. Erzen, E. Majdic, B. Stabuc, A. Plesnicar, R. Golouh, J. Lamovec, J. Jancar, I. Vrhovec, M. Kramberger

**Groote Schuur Hospital and University of Cape Town, Cape Town, Rep. of South Africa:** D.M. Dent, A. Gudgeon, E. Murray, G. Langman, I.D. Werner, P. Steynor, J. Toop, E. McEvoy

**Sandton Oncology Center, Johannesburg, Rep. of South Africa:** D. Vorobiof, M. Chasen, G. Fotheringham, G. de Muelenaere, B. Skudowitz, C. Mohammed, A. Rosengarten, C. Thatcher

**Madrid Breast Cancer Group, Madrid, Spain:** H. Cortés-Funes, C. Mendiola, J. Hornedo, R. Colomer, F. Cruz Vigo, P. Miranda, A. Sierra, F. Martinez-Tello, A. Garzon, S. Alonso, A. Ferrero

**West Swedish Breast Cancer Study Group, Göteborg, Sweden:** C.M. Rudenstam, M. Suurkula, Ö. Sjukhuset, G. Havel, S. Persson, J.H. Svensson, G. Östberg, S.B. Holmberg, A. Wallgren, S. Ottosson-Lönn, R. Hultborn, G. Colldahl-Jäderström, E. Cahlin, J. Mattsson, L. Ivarsson, O. Ruusvik, L.G. Niklasson, S. Dahlin, G. Karlsson, B. Lindberg, A. Sundbäck, S. Bergegårdh, H. Salander, C. Andersson, M. Heideman, Y. Hessman, O. Nelzén, G. Claes, T. Ramhult, A. Kovacs, P. Liedberg, L. Larsson, A. Nissborg, Z. Einbeigi, L. Klint, G. Lengstrand, P. Karlsson

**Swiss Group for Clinical Cancer Research (SAKK) member institutions - Inselspital, Bern, Switzerland:** M.F. Fey, M. Castiglione-Gertsch, E. Dreher, H. Schneider, S. Aebi, J. Ludin, G. Beck, A. Haenel, J.M. Lüthi, L. Mazzucchelli, J.P. Musy, H.J. Altermatt, M. Nandedkar, K. Buser

**Kantonsspital, St. Gallen, Switzerland:** H.J. Senn, B. Thürlimann, Ch. Oehlschlegel, G. Ries, M. Töpfer, U. Lorenz, O. Schiltknecht, B. Späti, A. Ehrensam, M. Bamert, W.F. Jungi

**Istituto Oncologico della Svizzera Italiana, Bellinzona, Switzerland:** F. Cavalli, O. Pagani, H. Neuenschwander, L. Bronz, C. Sessa, M. Ghielmini, T. Rusca, P. Rey, J. Bernier, E. Pedrinis, T. Gyr, L. Leidi, G. Pastorelli, G. Caccia, A. Goldhirsch

**Kantonsspital, Basel, Switzerland:** R. Herrmann, C.F. Rochlitz, J.F. Harder, S. Bartens, U. Eppenberger, J. Torhorst, H. Moch

**Hôpital des Cadolles, Neuchâtel, Switzerland:** D. Piguet, P. Siegenthaler, V. Barrelet, R.P. Baumann, B. Christen  
**University Hospital, Zürich, Switzerland:** B. Pestalozzi, C. Sauter, D. Fink, M. Fehr, U. Haller, U. Metzger, P. Huguenin, R. Caduff

**Centre Hospitalier Universitaire Vaudois, Lausanne, Switzerland:** L. Perey, S. Leyvraz, P. Anani, F. Gomez, D. Wellman, G. Chapuis, P. De Grandi, P. Reymond, M. Gillet, J.F. Delaloye, C. Genton, M. Fiche

**Hôpital Cantonal, Geneva, Switzerland:** P. Alberto, H. Bonnefoi, P. Schäfer, F. Krauer, M. Forni, M. Aapro, R. Egeli, R. Megevand, E. Jacot-des-Combes, A. Schindler, B. Borisch, S. Diebold, M. Genta, M. Pelte

**Kantonsspital Graubünden, Chur, Switzerland:** F. Egli, P. Forrer, A. Willi, R. Steiner, J. Allemann, T. Rüedi, A. Leutenegger, U. Dalla Torre, H. Frick

**Australian New Zealand Breast Cancer Trials Group (ANZ BCTG) member institutions - Operations Office, University of Newcastle:** J.F. Forbes, D. Lindsay

**The Cancer Council Victoria (previously Anti-Cancer Council of Victoria), Clinical Trials Office, Melbourne:** J. Collins, R. Snyder, B. Brown, E. Abdi, H. Armstrong, A. Barling, R. Bassar, P. Bhathal, W.I. Burns, M. Chipman, J. Chirgwin, I. Davis, R. Drummond, D. Finkelde, P. Francis, D. Gee, G. Goss, M. Green, P. Gregory, J. Griffiths, S. Hart, D. Hastrich, M. Henderson, R. Holmes, P. Jeal, D. Joseph, P. Kitchen, P. Kostos, G. Lindeman, B. Mann, R. McLennan, L. Mileshkin, P. Mitchell, C. Murphy, S. Neil, I. Olver, M. Pitcher, A. Read, D. Reading, R. Reed, G.

Richardson, A. Rodger, I. Russell, M. Schwarz, S. Slade, R. Stanley, M. Steele, J. Stewart, C. Underhill, J. Zalberg, A. Zimet, C. Dow, R. Valentine

**Flinders Medical Centre, Bedford Park, South Australia:** T. Malden

**Mount Hospital, Perth, Western Australia:** G. Van Hazel

**Calvary Mater Newcastle, Newcastle, Australia:** J.F. Forbes, S. Braye, J. Stewart, D. Jackson, R. Gourlay, J. Bishop, S. Cox, S. Ackland, A. Bonaventura, C. Hamilton, J. Denham, P. O'Brien, M. Back, S. Brae, R. Muragasu

**Prince of Wales, Randwick, NSW, Australia:** M. Friedlander, B. Bringham, C. Lewis

**Royal Adelaide Hospital, Adelaide, Australia:** I.N. Olver, D. Keefe, M. Brown, P.G. Gill, A. Taylor, E. Yeoh, E. Abdi, J. Cleary, F. Parnis

**Sir Charles Gairdner Hospital, Nedlands, Western Australia:** M. Byrne, G. Van Hazel, J. Dewar, M. Buck, G. Sterrett, D. Ingram, D. Hastrich, D. Joseph, F. Cameron, K.B. Shilkin, P. Mitchell, J. Sharpio, G. Harloe, J. Lewis, B. Snowball, P. Garcia Webb, J. Harvey, W.D. De Boer, P Robbins, N. Buxton, M.N.I Walters

**University of Sydney, Dubbo Base Hospital and Royal Prince Alfred Hospital, Sydney, Australia:** J. Beith, M.H.N. Tattersall, A.S. Coates, F. Niesche, R. West, S. Renwick, J. Donovan, P. Duval, R. J. Simes, A. Ng, D. Glenn, R.A. North, R. G. O'Connor, M. Rice, G. Stevens, J. Grassby, S. Pendlebury, C. McLeod, M. Boyer, A. Sullivan, J. Hobbs, D. Lind, J. Grace, P. McKenzie

**W.P. Holman Clinic, Launceston:** D. Boadle, T. Brain, I. Byard, D. Byram.

**Auckland Breast Cancer Study Group, Auckland, New Zealand:** V.J. Harvey, R.G. Kay, P. Thompson, D. Porter, C.S. Benjamin, A. Bierre, M. Miller, B. Hochstein, A. Lethaby, J. Webber, J.P. Allen, M. Allon, J.F. Arthur, M. Gurley, P. Symmans, M. Christie, A.R. King

**Waikato Hospital, Hamilton, New Zealand:** I. Kennedy, G. Round, J. Long
